# Supplementary material
Source: ML conference proceedings conference paper supplement (https://proceedings.neurips.cc/paper_files/paper/2014/hash/918317b57931b6b7a7d29490fe5ec9f9-Abstract.html)
Supplement: Supplementary file [file 918317b57931b6b7a7d29490fe5ec9f9-Supplemental.zip]

## A Tsybakov Noise Conditions

An important sub-case of learning from noisy data is learning under the Tsybakov noise conditions [30].

**Definition 1.** (*Tsybakov Noise Condition*) Let  $\kappa \geq 1$ . A labelled data distribution  $D$  over  $\mathcal{X} \times \mathcal{Y}$  satisfies  $(C_0, \kappa)$ -Tsybakov Noise Condition with respect to a hypothesis class  $\mathcal{H}$  for some constant  $C_0 > 0$ , if for all  $h \in \mathcal{H}$ ,  $\rho_D(h, h^*(D)) \leq C_0(\text{err}_D(h) - \text{err}_D(h^*(D)))^{\frac{1}{\kappa}}$ .

The following theorem shows the performance guarantees achieved by Algorithm 1 under the Tsybakov noise conditions.

**Theorem 5.** Suppose  $(C_0, \kappa)$ -Tsybakov Noise Condition holds for  $D$  with respect to  $\mathcal{H}$ . Then Algorithm 1 with inputs example oracle  $\mathcal{U}$ , labelling oracle  $\mathcal{O}$ , hypothesis class  $\mathcal{H}$ , confidence-rated predictor  $P$  of Algorithm 3, target excess error  $\epsilon$  and target confidence  $\delta$  satisfies the following properties. There exists a constant  $c_5 > 0$  such that with probability  $1 - \delta$ , the total number of labels queried by Algorithm 1 is at most:

$$c_5 \sum_{k=1}^{\lceil \log \frac{1}{\epsilon} \rceil} (d \ln(\phi(C_0 \epsilon_k^{\frac{1}{\kappa}}, \epsilon_k/256) \epsilon_k^{\frac{1}{\kappa}-2}) + \ln(\frac{\lceil \log \frac{1}{\epsilon} \rceil - k + 1}{\delta})) \phi(C_0 \epsilon_k^{\frac{1}{\kappa}}, \epsilon_k/256) \epsilon_k^{\frac{1}{\kappa}-2}$$

**Comparison.** [20] provides a label complexity bound of  $\tilde{O}(\theta(C_0 \epsilon^{\frac{1}{\kappa}}) \epsilon^{\frac{2}{\kappa}-2} \ln \frac{1}{\epsilon} (d \ln \theta(C_0 \epsilon^{\frac{1}{\kappa}}) + \ln \ln \frac{1}{\epsilon}))$  for disagreement-based active learning. For  $\kappa > 1$ , by Proposition 2, our label complexity is at most:

$$\tilde{O} \left( \sup_{k \leq \lceil \log(1/\epsilon) \rceil} \frac{\phi(C_0 \epsilon_k^{\frac{1}{\kappa}}, \epsilon_k/256)}{\epsilon_k^{\frac{1}{\kappa}}} \cdot \epsilon_k^{2/\kappa-2} \cdot d \ln(1/\epsilon) \right),$$

For  $\kappa = 1$ , our label complexity is at most

$$\tilde{O} \left( \ln \frac{1}{\epsilon} \cdot \sup_{k \leq \lceil \log(1/\epsilon) \rceil} \frac{\phi(C_0 \epsilon_k, \epsilon_k/256)}{\epsilon_k} \cdot \left( d \ln \left( \sup_{k \leq \lceil \log(1/\epsilon) \rceil} \frac{\phi(C_0 \epsilon_k, \epsilon_k/256)}{\epsilon_k} \right) + \ln \ln \frac{1}{\epsilon} \right) \right).$$

In both cases, our bounds are better, as  $\sup_{k \leq \lceil \log(1/\epsilon) \rceil} \frac{\phi(C_0 \epsilon_k^{\frac{1}{\kappa}}, \epsilon_k/256)}{C_0 \epsilon_k^{\frac{1}{\kappa}}} \leq \theta(C_0 \epsilon^{\frac{1}{\kappa}})$ . In further work, [21] provides a refined analysis with a bound of  $\tilde{O}(\theta(C_0 \epsilon^{\frac{1}{\kappa}}) \epsilon^{\frac{2}{\kappa}-2} d \ln \theta(C_0 \epsilon^{\frac{1}{\kappa}}))$ ; however, this work is not directly comparable to ours, as they need prior knowledge of  $C_0$  and  $\kappa$ .

## B Additional Notation and Concentration Lemmas

We begin with some additional notation that will be used in the subsequent proofs. Recall that we define:

$$\sigma(n, \delta) = \frac{16}{n} (2d \ln \frac{2en}{d} + \ln \frac{24}{\delta}), \quad (3)$$

where  $d$  is the VC dimension of the hypothesis class  $\mathcal{H}$ .

The following lemma is an immediate corollary of the multiplicative VC bound; we pick the version of the multiplicative VC bound due to [22].

**Lemma 7.** Pick any  $n \geq 1$ ,  $\delta \in (0, 1)$ . Let  $S_n$  be a set of  $n$  iid copies of  $(X, Y)$  drawn from a distribution  $D$  over labelled examples. Then, the following hold with probability at least  $1 - \delta$  over the choice of  $S_n$ :

(1) For all  $h \in \mathcal{H}$ ,

$$|\text{err}_D(h) - \text{err}_{S_n}(h)| \leq \min(\sigma(n, \delta) + \sqrt{\sigma(n, \delta) \text{err}_D(h)}, \sigma(n, \delta) + \sqrt{\sigma(n, \delta) \text{err}_{S_n}(h)}) \quad (4)$$

In particular, all classifiers  $h$  in  $\mathcal{H}$  consistent with  $S_n$  satisfies

$$\text{err}_D(h) \leq \sigma(n, \delta) \quad (5)$$

(2) For all  $h, h'$  in  $\mathcal{H}$ ,

$$|(err_D(h) - err_D(h')) - (err_{S_n}(h) - err_{S_n}(h'))| \leq \sigma(n, \delta) + \min(\sqrt{\sigma(n, \delta)\rho_D(h, h')}, \sqrt{\sigma(n, \delta)\rho_{S_n}(h, h')}) \quad (6)$$

$$|\rho_D(h, h') - \rho_{S_n}(h, h')| \leq \sigma(n, \delta) + \min(\sqrt{\sigma(n, \delta)\rho_D(h, h')}, \sqrt{\sigma(n, \delta)\rho_{S_n}(h, h')}) \quad (7)$$

Where  $\sigma(n, \delta)$  is defined in Equation (3).

We occasionally use the following (weaker) version of Lemma 7.

**Lemma 8.** Pick any  $n \geq 1$ ,  $\delta \in (0, 1)$ . Let  $S_n$  be a set of  $n$  iid copies of  $(X, Y)$ . The following holds with probability at least  $1 - \delta$ : (1) For all  $h \in \mathcal{H}$ ,

$$|err_D(h) - err_{S_n}(h)| \leq \sqrt{4\sigma(n, \delta)} \quad (8)$$

(2) For all  $h, h'$  in  $\mathcal{H}$ ,

$$|(err_D(h) - err_D(h')) - (err_{S_n}(h) - err_{S_n}(h'))| \leq \sqrt{4\sigma(n, \delta)} \quad (9)$$

$$|\rho_D(h, h') - \rho_{S_n}(h, h')| \leq \sqrt{4\sigma(n, \delta)} \quad (10)$$

Where  $\sigma(n, \delta)$  is defined in Equation (3).

For an unlabelled sample  $U_k$ , we use  $\tilde{U}_k$  to denote the joint distribution over  $\mathcal{X} \times \mathcal{Y}$  induced by uniform distribution over  $U_k$  and  $D_{Y|X}$ . We have:

**Lemma 9.** If the size of  $n_k$  of the unlabelled dataset  $U_k$  is at least  $192(\frac{512}{\epsilon_k})^2(d \ln 192(\frac{512}{\epsilon_k})^2 + \ln \frac{288}{\delta_k})$ , then with probability  $1 - \delta_k/4$ , the following conditions hold for all  $h, h' \in V_k$ :

$$|err_D(h) - err_{\tilde{U}_k}(h)| \leq \frac{\epsilon_k}{64} \quad (11)$$

$$|(err_D(h) - err_D(h')) - (err_{\tilde{U}_k}(h) - err_{\tilde{U}_k}(h'))| \leq \frac{\epsilon_k}{32} \quad (12)$$

$$|\rho_D(h, h') - \rho_{\tilde{U}_k}(h, h')| \leq \frac{\epsilon_k}{64} \quad (13)$$

**Lemma 10.** If the size of  $n_k$  of the unlabelled dataset  $U_k$  is at least  $192(\frac{512}{\epsilon_k})^2(d \ln 192(\frac{512}{\epsilon_k})^2 + \ln \frac{288}{\delta_k})$ , then with probability  $1 - \delta_k/4$ , the following hold:

(1) The outputs  $\{(\xi_{k,i}, \zeta_{k,i}, \gamma_{k,i})\}_{i=1}^{n_k}$  of any confidence-rated predictor with inputs hypothesis set  $V_k$ , unlabelled data  $U_k$ , and error bound  $\epsilon_k/64$  satisfy:

$$\frac{1}{n_k} \sum_{i=1}^{n_k} [I(h(x_i) \neq h'(x_i))(1 - \gamma_{k,i})] \leq \frac{\epsilon_k}{32}; \quad (14)$$

(2) The outputs  $\{(\xi_{k,i}, \zeta_{k,i}, \gamma_{k,i})\}_{i=1}^{n_k}$  of the confidence-rated predictor of Algorithm 3 with inputs hypothesis set  $V_k$ , unlabelled data  $U_k$ , and error bound  $\epsilon_k/64$  satisfy:

$$\phi_k \leq \Phi_D(V_k, \frac{\epsilon_k}{128}) + \frac{\epsilon_k}{256} \quad (15)$$

We use  $\tilde{\Gamma}_k$  to denote the joint distribution over  $\mathcal{X} \times \mathcal{Y}$  induced by  $\Gamma_k$  and  $D_{Y|X}$ . Denote  $\gamma_k(x) : \mathcal{X} \rightarrow [0, 1]$ , where  $\gamma_k(x_i) = \gamma_{k,i}$ , and 0 elsewhere. Clearly,  $\Gamma_k(\{x\}) = \frac{\gamma_k(x)}{n_k \phi_k}$  and  $\tilde{\Gamma}_k(\{(x, y)\}) = \frac{\tilde{U}_k(\{(x, y)\})\gamma_k(x)}{\phi_k}$ . Also, Equations (14) and (15) of Lemma 10 can be restated as

$$\forall h, h' \in V_k, \mathbb{E}_{\tilde{U}_k} [(1 - \gamma_k(x))I(h(x) \neq h'(x))] \leq \frac{\epsilon_k}{32}$$

$$\mathbb{E}_{\tilde{U}_k} [\gamma_k(x)] = \phi_k \leq \Phi_D(V_k, \frac{\epsilon_k}{128}) + \frac{\epsilon_k}{256}$$

In the realizable case, define event

$$E_r = \{\text{For all } k = 1, 2, \dots, k_0: \text{Equations (11), (12), (13), (14), (15) hold for } \tilde{U}_k \text{ and all classifiers consistent with } S_k \text{ have error at most } \frac{\epsilon_k}{8\phi_k} \text{ with respect to } \tilde{\Gamma}_k \}.$$

**Fact 1.**  $\mathbb{P}(E_r) \geq 1 - \delta$ .

*Proof.* By Equation (5) of Lemma 7, with probability  $1 - \delta_k/2$ , if  $h \in V_k$  is consistent with  $S_k$ , then

$$\text{err}_{\Gamma_k}(h) \leq \sigma(m_k, \delta_k/2)$$

Because  $m_k = \frac{1536\phi_k}{\epsilon_k} (d \ln \frac{1536\phi_k}{\epsilon_k} + \ln \frac{48}{\delta_k})$ , we have  $\text{err}_{\Gamma_k}(h) \leq \epsilon_k/8\phi_k$ . The fact follows from combining the fact above with Lemma 9 and Lemma 10, and the union bound.  $\square$

In the non-realizable case, define event

$$E_a = \{\text{For all } k = 1, 2, \dots, k_0: \text{Equations (11), (12), (13), (14), (15) hold for } \tilde{U}_k, \\ \text{and Algorithm 2 succeeds with inputs hypothesis set } V = V_k, \text{ example distribution } \Delta = \Gamma_k, \\ \text{labelling oracle } \mathcal{O}, \text{ target excess error } \tilde{\epsilon} = \frac{\epsilon_k}{8\phi_k} \text{ and target confidence } \tilde{\delta} = \frac{\delta_k}{2}\}.$$

**Fact 2.**  $\mathbb{P}(E_a) \geq 1 - \delta$ .

*Proof.* This is an immediate consequence of Lemma 9, Lemma 10, Lemma 4 and union bound.  $\square$

Recall that we assume the hypothesis space is “dense”, in the sense that  $\forall r > 0$ ,  $\sup_{h \in B_D(h^*(D), r)} \rho(h, h^*(D)) = r$ . We will call this the “denseness assumption”.

## C Proofs related to the properties of Algorithm 2

We first establish some properties of Algorithm 2. The inputs to Algorithm 2 are a set  $V$  of hypotheses of VC dimension  $d$ , an example distribution  $\Delta$ , a labeling oracle  $\mathcal{O}$ , a target excess error  $\tilde{\epsilon}$  and a target confidence  $\tilde{\delta}$ .

We define the event

$$\tilde{E} = \{\text{For all } j = 1, 2, \dots : \text{Equations (4)-(7) hold for sample } S_j \text{ with } n = n_j \text{ and } \delta = \tilde{\delta}_j\}$$

By union bound,  $\mathbb{P}(\tilde{E}) \geq 1 - \sum_j \tilde{\delta}_j \geq 1 - \tilde{\delta}$ .

*Proof.* (of Lemma 4) Assume  $\tilde{E}$  happens. For the proof of (1), define  $j_{max}$  as the smallest integer  $j$  such that  $\sigma(n_j, \tilde{\delta}_j) \leq \tilde{\epsilon}^2/144$ . Since  $n_{j_{max}}$  is a power of 2,

$$n_{j_{max}} \leq 2 \min\{n = 1, 2, \dots : \frac{16(2d \ln \frac{2en}{d} + \ln \frac{24 \log n(\log n+1)}{\delta})}{n} \leq \frac{\tilde{\epsilon}^2}{144}\}$$

Thus,  $n_{j_{max}} \leq 384 \frac{144}{\tilde{\epsilon}^2} (d \ln 192 \frac{144}{\tilde{\epsilon}^2} + \ln \frac{24}{\delta})$ . Then in round  $j_{max}$ , the stopping criterion (6) of Algorithm 2 is satisfied; thus, Algorithm 2 halts with  $j_0 \leq j_{max}$ .

To prove (2.1), we observe that as  $h^*(\tilde{\Delta})$  is the risk minimizer in  $V$ , if  $h$  satisfies  $\text{err}_{\tilde{\Delta}}(h) - \text{err}_{\tilde{\Delta}}(h^*(\tilde{\Delta})) \leq \frac{\tilde{\epsilon}}{2}$ , then  $\text{err}_{\tilde{\Delta}}(h) - \text{err}_{\tilde{\Delta}}(\hat{h}_{j_0}) \leq \frac{\tilde{\epsilon}}{2}$ . By Equation (6) of Lemma 7,

$$\begin{aligned} (\text{err}_{S_{j_0}}(h) - \text{err}_{S_{j_0}}(\hat{h}_{j_0})) &\leq (\text{err}_{\tilde{\Delta}}(h) - \text{err}_{\tilde{\Delta}}(\hat{h}_{j_0})) + \sigma(n_{j_0}, \tilde{\delta}_{j_0}) + \sqrt{\sigma(n_{j_0}, \tilde{\delta}_{j_0}) \rho_{S_{j_0}}(h, \hat{h}_{j_0})} \\ &\leq \frac{\tilde{\epsilon}}{2} + \sigma(n_{j_0}, \tilde{\delta}_{j_0}) + \sqrt{\sigma(n_{j_0}, \tilde{\delta}_{j_0}) \rho_{S_{j_0}}(h, \hat{h}_{j_0})} \end{aligned}$$

Hence  $h \in V_{j_0}$ .

For the proof of (2.2), note first that by (2.1), in particular,  $h^*(\tilde{\Delta}) \in V_{j_0}$ . Hence by Equation (6) of Lemma 7, and the stopping criterion Equation (6),

$$(\text{err}_{\tilde{\Delta}}(\hat{h}_{j_0}) - \text{err}_{\tilde{\Delta}}(h^*(\tilde{\Delta}))) - (\text{err}_{S_{j_0}}(\hat{h}_{j_0}) - \text{err}_{S_{j_0}}(h^*(\tilde{\Delta}))) \leq \sigma(n_{j_0}, \tilde{\delta}_{j_0}) + \sqrt{\sigma(n_{j_0}, \tilde{\delta}_{j_0}) \rho_{S_{j_0}}(\hat{h}_{j_0}, h^*(\tilde{\Delta}))} \leq \frac{\tilde{\epsilon}}{6}$$

Thus,

$$\text{err}_{\tilde{\Delta}}(\hat{h}_{j_0}) - \text{err}_{\tilde{\Delta}}(h^*(\tilde{\Delta})) \leq \frac{\tilde{\epsilon}}{6} \quad (16)$$

On the other hand, if  $h \in V_{j_0}$ , then

$$(\text{err}_{\tilde{\Delta}}(h) - \text{err}_{\tilde{\Delta}}(\hat{h}_{j_0})) - (\text{err}_{S_{j_0}}(h) - \text{err}_{S_{j_0}}(\hat{h}_{j_0})) \leq \sigma(n_{j_0}, \tilde{\delta}_{j_0}) + \sqrt{\sigma(n_{j_0}, \tilde{\delta}_{j_0})\rho_{S_{j_0}}(h, \hat{h}_{j_0})} \leq \frac{\tilde{\epsilon}}{6}$$

By definition of  $V_{j_0}$ ,

$$(\text{err}_{S_{j_0}}(h) - \text{err}_{S_{j_0}}(\hat{h}_{j_0})) \leq \sigma(n_{j_0}, \tilde{\delta}_{j_0}) + \sqrt{\sigma(n_{j_0}, \tilde{\delta}_{j_0})\rho_{S_{j_0}}(h, \hat{h}_{j_0})} + \frac{\tilde{\epsilon}}{2} \leq \frac{2\tilde{\epsilon}}{3}$$

Hence,

$$\text{err}_{\tilde{\Delta}}(h) - \text{err}_{\tilde{\Delta}}(\hat{h}_{j_0}) \leq \frac{5\tilde{\epsilon}}{6} \quad (17)$$

Combining Equations (16) and (17), we have

$$\text{err}_{\tilde{\Delta}}(h) - \text{err}_{\tilde{\Delta}}(h^*(\tilde{\Delta})) \leq \tilde{\epsilon}$$

□

*Proof.* (of Lemma 5) Assume  $\tilde{E}$  happens. For each  $j$ , by triangle inequality, we have that  $\rho_{S_j}(\hat{h}_j, h) \leq \text{err}_{S_j}(\hat{h}_j) + \text{err}_{S_j}(h)$ . If  $h \in V_j$ , then, by definition of  $V_j$ ,

$$\text{err}_{S_j}(h) - \text{err}_{S_j}(\hat{h}_j) \leq \frac{\tilde{\epsilon}}{2} + \sigma(n_j, \tilde{\delta}_j) + \sqrt{\sigma(n_j, \tilde{\delta}_j)\text{err}_{S_j}(\hat{h}_j)} + \sqrt{\sigma(n_j, \tilde{\delta}_j)\text{err}_{S_j}(h)}$$

Using the fact that  $A \leq B + C\sqrt{A} \Rightarrow A \leq 2B + C^2$ ,

$$\text{err}_{S_j}(h) \leq \tilde{\epsilon} + 2\text{err}_{S_j}(\hat{h}_j) + 2\sqrt{\sigma(n_j, \tilde{\delta}_j)\text{err}_{S_j}(\hat{h}_j)} + 3\sigma(n_j, \tilde{\delta}_j) \leq 3\text{err}_{S_j}(\hat{h}_j) + 4\sigma(n_j, \tilde{\delta}_j) + \tilde{\epsilon}$$

Since

$$\text{err}_{S_j}(\hat{h}_j) \leq \text{err}_{S_j}(h^*(\tilde{\Delta})) \leq \nu^*(\tilde{\Delta}) + \sqrt{\sigma(n_j, \tilde{\delta}_j)\nu^*(\tilde{\Delta})} + \sigma(n_j, \tilde{\delta}_j) \leq 2\nu^*(\tilde{\Delta}) + 2\sigma(n_j, \tilde{\delta}_j),$$

by the triangle inequality, we get that for all  $h \in V_j$ ,

$$\rho_{S_j}(h, \hat{h}_j) \leq \text{err}_{S_j}(h) + \text{err}_{S_j}(\hat{h}_j) \leq 8\nu^*(\tilde{\Delta}) + 12\sigma(n_j, \tilde{\delta}_j) + \tilde{\epsilon} \quad (18)$$

Now observe that for any  $j$ ,

$$\begin{aligned} & \sup_{h \in V_j} \sqrt{\sigma(n_j, \tilde{\delta}_j)\rho_{S_j}(h, \hat{h}_j)} + \sigma(n_j, \tilde{\delta}_j) \\ & \leq \sup_{h \in V_j} \max(2\sqrt{\sigma(n_j, \tilde{\delta}_j)\rho_{S_j}(h, \hat{h}_j)}, 2\sigma(n_j, \tilde{\delta}_j)) \\ & \leq \max(2\sqrt{(8\nu^*(\tilde{\Delta}) + 12\sigma(n_j, \tilde{\delta}_j) + \tilde{\epsilon})\sigma(n_j, \tilde{\delta}_j)}, 2\sigma(n_j, \tilde{\delta}_j)) \\ & \leq \max(12\sqrt{2\nu^*(\tilde{\Delta})\sigma(n_j, \tilde{\delta}_j)}, \tilde{\epsilon}/6, 216\sigma(n_j, \tilde{\delta}_j)), \end{aligned}$$

Where the first inequality follows from  $A + B \leq 2\max(A, B)$ , the second inequality follows from Equation (18), the third inequality follows from  $\sqrt{A+B} \leq \sqrt{A} + \sqrt{B}$ ,  $A + B + C \leq 3\max(A, B, C)$  and  $\sqrt{AB} \leq \max(A, B)$ .

It can be easily seen that there exists some constant  $c_1 > 0$ , such that taking  $j_1 = \lceil \log \left( \frac{c_1}{2} (d \ln \frac{1}{\tilde{\epsilon}} + \ln \frac{1}{\tilde{\delta}}) (\frac{\nu^*(\tilde{\Delta}) + \tilde{\epsilon}}{\tilde{\epsilon}^2}) \right) \rceil$  ensures that  $n_{j_1} \geq \frac{c_1}{2} (d \ln \frac{1}{\tilde{\epsilon}} + \ln \frac{1}{\tilde{\delta}}) (\frac{\nu^*(\tilde{\Delta}) + \tilde{\epsilon}}{\tilde{\epsilon}^2})$ ; this, in turn, suffices to make

$$\max(12\sqrt{2\nu^*(\tilde{\Delta})\sigma(n_j, \tilde{\delta}_j)}, 216\sigma(n_j, \tilde{\delta}_j)) \leq \tilde{\epsilon}/6$$

Hence the stopping criterion  $\sup_{h \in V_j} \sqrt{\sigma(n_j, \tilde{\delta}_j)\rho_{S_j}(h, \hat{h}_j)} + \sigma(n_j, \tilde{\delta}_j) \leq \tilde{\epsilon}/6$  is satisfied in iteration  $j_1$ , and Algorithm 2 exits at iteration  $j_0 \leq j_1$ , which ensures that  $n_{j_0} \leq n_{j_1} \leq c_1(d \ln \frac{1}{\tilde{\epsilon}} + \ln \frac{1}{\tilde{\delta}}) (\frac{\nu^*(\tilde{\Delta}) + \tilde{\epsilon}}{\tilde{\epsilon}^2})$ . □

The following lemma examines the behavior of Algorithm 2 under the Tsybakov Noise Condition and is crucial in the proof of Theorem 5. We observe that even if the  $(C_0, \kappa)$ -Tsybakov Noise Conditions hold with respect to  $D$ , they do not necessarily hold with respect to  $\Gamma_k$ . In particular, it is not necessarily true that:

$$\rho_{\Gamma_k}(h, h^*(D)) \leq C_0(\text{err}_{\Gamma_k}(h) - \text{err}_{\Gamma_k}(h^*(D)))^{\frac{1}{\kappa}}, \forall h \in V_k$$

However, we show that an “approximate” Tsybakov Noise Condition with a significantly larger “ $C_0$ ”, namely Condition (19) is met by  $\tilde{\Gamma}_k$  and  $V_k$ , with  $C = \max(8C_0, 4)\phi_k^{\frac{1}{\kappa}-1}$  and  $\tilde{h} = h^*(D)$ . In the Lemma below, we carefully track the dependence of the number of our label queries on  $C$ , since  $C = \max(8C_0, 4)\phi_k^{\frac{1}{\kappa}-1}$  can be  $\omega(1)$  in our particular application.

**Lemma 11.** *Suppose we run Algorithm 2 with inputs hypothesis set  $V$ , example distribution  $\tilde{\Delta}$ , labelling oracle  $\mathcal{O}$ , excess generalization error  $\tilde{\epsilon}$  and confidence  $\tilde{\delta}$ . Then there exists some absolute constant  $c_2 > 0$  (independent of  $C$ ) such that the following holds. Suppose there exist  $C > 0$  and a classifier  $\tilde{h} \in V$ , such that*

$$\forall h \in V, \rho_{\tilde{\Delta}}(h, \tilde{h}) \leq C \max(\tilde{\epsilon}, \text{err}_{\tilde{\Delta}}(h) - \text{err}_{\tilde{\Delta}}(\tilde{h}))^{\frac{1}{\kappa}}, \quad (19)$$

where  $\tilde{\epsilon}$  is the target excess error parameter in Algorithm 2. Then, on the event that Algorithm 2 succeeds,

$$n_{j_0} \leq c_2 \max((d \ln \frac{1}{\tilde{\epsilon}} + \ln \frac{1}{\tilde{\delta}}) \tilde{\epsilon}^{-1}, (d \ln(C \tilde{\epsilon}^{\frac{1}{\kappa}-2}) + \ln \frac{1}{\tilde{\delta}}) C \tilde{\epsilon}^{\frac{1}{\kappa}-2})$$

Observe that Condition (19), the approximate Tsybakov Noise Condition in the statement of Lemma 11, is with respect to  $\tilde{h}$ , which is not necessarily the true risk minimizer in  $V$  with respect to  $\tilde{\Delta}$ . We therefore prove Lemma 11 in three steps; first, in Lemma 12, we analyze the difference  $\text{err}_{\tilde{\Delta}}(\hat{h}) - \text{err}_{\tilde{\Delta}}(\tilde{h})$ , where  $\hat{h}$  is the empirical risk minimizer. Then, in Lemma 13, we bound the difference  $\text{err}_{\tilde{\Delta}}(h) - \text{err}_{\tilde{\Delta}}(\tilde{h})$  for any  $h \in V_j$  for some  $j$ . Finally, we combine these two lemmas to provide sample complexity bounds for the  $V_{j_0}$  output by Algorithm 2.

*Proof.* (of Lemma 11) Assume the event  $\tilde{E}$  happens. Then,

Consider iteration  $j$ , by Lemma 13, if  $h \in V_j$ , then

$$\rho_{\tilde{\Delta}}(h, \hat{h}_j) \leq \rho_{\tilde{\Delta}}(h, \tilde{h}) + \rho_{\tilde{\Delta}}(\hat{h}_j, \tilde{h}) \leq \max(2C(36\tilde{\epsilon})^{\frac{1}{\kappa}}, 2C(52\sigma(n_j, \tilde{\delta}_j))^{\frac{1}{\kappa}}, 2C(6400C\sigma(n_j, \tilde{\delta}_j))^{\frac{1}{2\kappa-1}}). \quad (20)$$

We can write:

$$\begin{aligned} \sup_{h \in V_j} \sigma(n_j, \tilde{\delta}_j) + \sqrt{\sigma(n_j, \tilde{\delta}_j) \rho_{S_j}(h, \hat{h}_j)} &\leq \sup_{h \in V_j} 3\sigma(n_j, \tilde{\delta}_j) + \sqrt{2\sigma(n_j, \tilde{\delta}_j) \rho_{\tilde{\Delta}}(h, \hat{h}_j)} \\ &\leq \sup_{h \in V_j} \max(6\sigma(n_j, \tilde{\delta}_j), 2\sqrt{2\sigma(n_j, \tilde{\delta}_j) \rho_{\tilde{\Delta}}(h, \hat{h}_j)}), \end{aligned}$$

where the first inequality follows from Equation (23) and the second inequality follows  $A + B \leq 2 \max(A, B)$ . We can further use Equation (20) to show that this is at most:

$$\begin{aligned} &\leq \max(6\sigma(n_j, \tilde{\delta}_j), (16C\sigma(n_j, \tilde{\delta}_j))^{\frac{1}{2}} (36\tilde{\epsilon})^{\frac{1}{2\kappa}}, (16C\sigma(n_j, \tilde{\delta}_j))^{\frac{1}{2}} (52\sigma(n_j, \tilde{\delta}_j))^{\frac{1}{2\kappa}}, (6400C\sigma(n_j, \tilde{\delta}_j))^{\frac{\kappa}{2\kappa-1}}) \\ &\leq \max(6\sigma(n_j, \tilde{\delta}_j), \tilde{\epsilon}/6, (6400C\sigma(n_j, \tilde{\delta}_j))^{\frac{\kappa}{2\kappa-1}}) \end{aligned}$$

Here the last inequality follows from the fact that  $(16C\sigma(n_j, \tilde{\delta}_j))^{\frac{1}{2}} (36\tilde{\epsilon})^{\frac{1}{2\kappa}} \leq \max((3456C\sigma(n_j, \tilde{\delta}_j))^{\frac{\kappa}{2\kappa-1}}, \tilde{\epsilon}/6)$  and  $(16C\sigma(n_j, \tilde{\delta}_j))^{\frac{1}{2}} (52\sigma(n_j, \tilde{\delta}_j))^{\frac{1}{2\kappa}} \leq \max((144C\sigma(n_j, \tilde{\delta}_j))^{\frac{\kappa}{2\kappa-1}}, 6\sigma(n_j, \tilde{\delta}_j))$ , since  $A^{\frac{2\kappa-1}{2\kappa}} B^{\frac{1}{2\kappa}} \leq \max(A, B)$ .

It can be easily seen that there exists  $c_2 > 0$ , such that taking  $j_1 = \lceil \log \frac{c_2}{2} (d \ln \frac{\max(C, 1)}{\tilde{\epsilon}} + \ln \frac{1}{\tilde{\delta}}) (C \tilde{\epsilon}^{\frac{1}{\kappa}-2} + \tilde{\epsilon}^{-1}) \rceil$ , so that  $n_j \geq \frac{c_2}{2} (d \ln \frac{\max(C, 1)}{\tilde{\epsilon}} + \ln \frac{1}{\tilde{\delta}}) (C \tilde{\epsilon}^{\frac{1}{\kappa}-2} + \tilde{\epsilon}^{-1})$  suffices to make

$$\max(6\sigma(n_j, \tilde{\delta}_j), (6400C\sigma(n_j, \tilde{\delta}_j))^{\frac{\kappa}{2\kappa-1}}) \leq \tilde{\epsilon}/6$$

Hence the stopping criterion  $\sup_{h \in V_j} \sqrt{\sigma(n_j, \tilde{\delta}_j) \rho_{S_j}(h, \hat{h}_j)} + \sigma(n_j, \tilde{\delta}_j) \leq \tilde{\epsilon}/6$  is satisfied in iteration  $j_1$ . Thus the number of the exit iteration  $j_0$  satisfies  $j_0 \leq j_1$ , and  $n_{j_0} \leq n_{j_1} \leq c_2 \max((d \ln \frac{1}{\tilde{\epsilon}} + \ln \frac{1}{\delta}) \tilde{\epsilon}^{-1}, (d \ln(C \tilde{\epsilon}^{\frac{1}{\kappa}-2}) + \ln \frac{1}{\delta}) C \tilde{\epsilon}^{\frac{1}{\kappa}-2})$ .

□

**Lemma 12.** Suppose there exist  $C > 0$  and a classifier  $\tilde{h} \in V$ , such that Equation (19) holds. Suppose we draw a set  $S$  of  $n$  examples, denote the empirical risk minimizer over  $S$  as  $\hat{h}$ , then with probability  $1 - \delta$ :

$$\begin{aligned} \text{err}_{\tilde{\Delta}}(\hat{h}) - \text{err}_{\tilde{\Delta}}(\tilde{h}) &\leq \max(2\sigma(n, \delta), (4C\sigma(n, \delta))^{\frac{\kappa}{2\kappa-1}}, 2\tilde{\epsilon}) \\ \rho_{\tilde{\Delta}}(\hat{h}, \tilde{h}) &\leq \max(C(2\sigma(n, \delta))^{\frac{1}{\kappa}}, C(4C\sigma(n, \delta))^{\frac{1}{2\kappa-1}}, C(2\tilde{\epsilon})^{\frac{1}{\kappa}}) \end{aligned}$$

*Proof.* By Lemma 7, with probability  $1 - \delta$ , Equation (6) holds. Assume this happens.

$$\begin{aligned} &\text{err}_{\tilde{\Delta}}(\hat{h}) - \text{err}_{\tilde{\Delta}}(\tilde{h}) \\ &\leq \sigma(n, \delta) + \sqrt{\sigma(n, \delta) \rho_{\tilde{\Delta}}(\hat{h}, \tilde{h})} \\ &\leq 2 \max(\sigma(n, \delta), \sqrt{\sigma(n, \delta) C(\text{err}_{\tilde{\Delta}}(\hat{h}) - \text{err}_{\tilde{\Delta}}(\tilde{h}))^{\frac{1}{\kappa}}}, \sqrt{\sigma(n, \delta) C \tilde{\epsilon}^{\frac{1}{\kappa}}}) \\ &\leq \max(2\sigma(n, \delta), (4C\sigma(n, \delta))^{\frac{\kappa}{2\kappa-1}}, 2\tilde{\epsilon}) \end{aligned}$$

Where the first inequality is by Equation (6) of Lemma 7; the second inequality follow from Equation (19) and  $A + B \leq 2 \max(A, B)$ . The third inequality follows from  $2\sqrt{\sigma(n, \delta) C \tilde{\epsilon}^{\frac{1}{\kappa}}} \leq \max(2(C\sigma(n, \delta))^{\frac{\kappa}{2\kappa-1}}, 2\tilde{\epsilon})$ , since  $A^{\frac{2\kappa-1}{2\kappa}} B^{\frac{1}{2\kappa}} \leq \max(A, B)$ . As a consequence, by Equation (19),

$$\rho_{\tilde{\Delta}}(\hat{h}, \tilde{h}) \leq \max(C(2\sigma(n, \delta))^{\frac{1}{\kappa}}, C(4C\sigma(n, \delta))^{\frac{1}{2\kappa-1}}, C(2\tilde{\epsilon})^{\frac{1}{\kappa}})$$

□

**Lemma 13.** Suppose there exist a  $C > 0$  and a classifier  $\tilde{h} \in V$  such that Equation (19) holds. Suppose we draw a set  $S$  of  $n$  iid examples, and let  $\hat{h}$  denote the empirical risk minimizer over  $S$ . Moreover, we define:

$$\tilde{V} = \left\{ h \in V : \text{err}_S(h) \leq \text{err}_S(\hat{h}) + \frac{\tilde{\epsilon}}{2} + \sigma(n, \delta) + \sqrt{\sigma(n, \delta) \rho_S(h, \hat{h})} \right\}$$

then with probability  $1 - \delta$ , for all  $h \in \tilde{V}$ ,

$$\begin{aligned} \text{err}_{\tilde{\Delta}}(h) - \text{err}_{\tilde{\Delta}}(\tilde{h}) &\leq \max(52\sigma(n, \delta), 36\tilde{\epsilon}, (6400C\sigma(n, \delta))^{\frac{\kappa}{2\kappa-1}}) \\ \rho_{\tilde{\Delta}}(h, \tilde{h}) &\leq \max(C(36\tilde{\epsilon})^{\frac{1}{\kappa}}, C(52\sigma(n, \delta))^{\frac{1}{\kappa}}, C(6400C\sigma(n, \delta))^{\frac{1}{2\kappa-1}}) \end{aligned}$$

*Proof.* First, by Lemma 12,

$$\text{err}_{\tilde{\Delta}}(\hat{h}) - \text{err}_{\tilde{\Delta}}(\tilde{h}) \leq \max(2\sigma(n, \delta), (4C\sigma(n, \delta))^{\frac{\kappa}{2\kappa-1}}, 2\tilde{\epsilon}) \quad (21)$$

$$\rho_{\tilde{\Delta}}(\hat{h}, \tilde{h}) \leq \max(C(2\sigma(n, \delta))^{\frac{1}{\kappa}}, C(4C\sigma(n, \delta))^{\frac{1}{2\kappa-1}}, C(2\tilde{\epsilon})^{\frac{1}{\kappa}}) \quad (22)$$

Next, if  $h \in \tilde{V}$ , then

$$\text{err}_S(h) - \text{err}_S(\hat{h}) \leq \sigma(n, \delta) + \sqrt{\sigma(n, \delta) \rho_S(h, \hat{h})} + \frac{\tilde{\epsilon}}{2}$$

Combining it with Equation (6) of Lemma 7:  $\text{err}_{\tilde{\Delta}}(h) - \text{err}_{\tilde{\Delta}}(\hat{h}) \leq \text{err}_S(h) - \text{err}_S(\hat{h}) + \sqrt{\sigma(n, \delta) \rho_S(h, \hat{h})} + \sigma(n, \delta)$ , we get

$$\text{err}_{\tilde{\Delta}}(h) - \text{err}_{\tilde{\Delta}}(\hat{h}) \leq 2\sigma(n, \delta) + 2\sqrt{\sigma(n, \delta) \rho_S(h, \hat{h})} + \frac{\tilde{\epsilon}}{2}$$

By Equation (7) of Lemma 7,

$$\rho_S(h, \hat{h}) \leq \rho_{\bar{\Delta}}(h, \hat{h}) + \sqrt{\sigma(n, \delta) \rho_{\bar{\Delta}}(h, \hat{h})} + \sigma(n, \delta) \leq 2\rho_{\bar{\Delta}}(h, \hat{h}) + 2\sigma(n, \delta) \quad (23)$$

Therefore,

$$\text{err}_{\bar{\Delta}}(h) - \text{err}_{\bar{\Delta}}(\hat{h}) \leq 5\sigma(n, \delta) + 3\sqrt{\sigma(n, \delta) \rho_{\bar{\Delta}}(h, \hat{h})} + \frac{\tilde{\epsilon}}{2} \quad (24)$$

Hence

$$\begin{aligned} & \text{err}_{\bar{\Delta}}(h) - \text{err}_{\bar{\Delta}}(\tilde{h}) \\ &= (\text{err}_{\bar{\Delta}}(h) - \text{err}_{\bar{\Delta}}(\hat{h})) + (\text{err}_{\bar{\Delta}}(\hat{h}) - \text{err}_{\bar{\Delta}}(\tilde{h})) \\ &\leq (4C\sigma(n, \delta))^{\frac{\kappa}{2\kappa-1}} + 7\sigma(n, \delta) + 3\tilde{\epsilon} + 3\sqrt{\sigma(n, \delta) \rho_{\bar{\Delta}}(h, \hat{h})} \\ &\leq (4C\sigma(n, \delta))^{\frac{\kappa}{2\kappa-1}} + 7\sigma(n, \delta) + 3\tilde{\epsilon} + 3\sqrt{\sigma(n, \delta) \rho_{\bar{\Delta}}(h, \tilde{h})} + 3\sqrt{\sigma(n, \delta) \rho_{\bar{\Delta}}(\tilde{h}, \hat{h})} \end{aligned}$$

Here the first inequality follows from Equations (21) and (24) and  $\max(A, B, C) \leq A + B + C$ , and the second inequality follows from triangle inequality and  $\sqrt{A+B} \leq \sqrt{A} + \sqrt{B}$ .

From Equation (22),  $\sigma(n, \delta) \rho_{\bar{\Delta}}(\hat{h}, \tilde{h})$  is at most:

$$\begin{aligned} &\leq C\sigma(n, \delta) \cdot ((2\tilde{\epsilon})^{1/\kappa} + (2\sigma(n, \delta))^{1/\kappa} + (4C\sigma(n, \delta))^{1/(2\kappa-1)}) \\ &\leq (4C\sigma(n, \delta))^{2\kappa/(2\kappa-1)} + C\sigma(n, \delta)((2\tilde{\epsilon})^{1/\kappa} + (2\sigma(n, \delta))^{1/\kappa}) \\ &\leq (4C\sigma(n, \delta))^{2\kappa/(2\kappa-1)} + \max(4\tilde{\epsilon}^2, (C\sigma(n, \delta))^{2\kappa/(2\kappa-1)}) + \max(4\sigma(n, \delta)^2, (C\sigma(n, \delta))^{2\kappa/(2\kappa-1)}), \end{aligned}$$

where the first step follows from Equation (22), the second step from algebra, and the third step from using the fact that  $A^{\frac{2\kappa-1}{\kappa}} B^{\frac{1}{\kappa}} \leq \max(A^2, B^2)$ . Plugging this in to the previous equation, and using  $\max(A, B) \leq A + B$  and  $\sqrt{A+B} \leq \sqrt{A} + \sqrt{B}$ , we get that:

$$\text{err}_{\bar{\Delta}}(h) - \text{err}_{\bar{\Delta}}(\tilde{h}) \leq 10(4C\sigma(n, \delta))^{\kappa/(2\kappa-1)} + 9\tilde{\epsilon} + 13\sigma(n, \delta) + 3\sqrt{\sigma(n, \delta) \rho_{\bar{\Delta}}(h, \tilde{h})}$$

Combining this with the fact that  $A + B + C + D \leq 4 \max(A, B, C, D)$ , we get that this is at most:

$$\leq \max(40(4C\sigma(n, \delta))^{\kappa/(2\kappa-1)}, 36\tilde{\epsilon}, 52\sigma(n, \delta), 12\sqrt{\sigma(n, \delta) \rho_{\bar{\Delta}}(h, \tilde{h})})$$

Combining this with Condition (19), we get that this is at most:

$$\max(40(4C\sigma(n, \delta))^{\kappa/(2\kappa-1)}, 36\tilde{\epsilon}, 52\sigma(n, \delta), 12\sqrt{C\sigma(n, \delta)\tilde{\epsilon}^{1/\kappa}}, 12\sqrt{C\sigma(n, \delta)(\text{err}_{\bar{\Delta}}(h) - \text{err}_{\bar{\Delta}}(\tilde{h}))^{1/\kappa}})$$

Using  $A^{(2\kappa-1)/2\kappa} B^{1/2\kappa} \leq \max(A, B)$ , we get that  $\sqrt{C\sigma(n, \delta)\tilde{\epsilon}^{1/\kappa}} \leq \max(\tilde{\epsilon}, (C\sigma(n, \delta))^{\kappa/(2\kappa-1)})$ . Also note  $\text{err}_{\bar{\Delta}}(h) - \text{err}_{\bar{\Delta}}(\tilde{h}) \leq 12\sqrt{C\sigma(n, \delta)(\text{err}_{\bar{\Delta}}(h) - \text{err}_{\bar{\Delta}}(\tilde{h}))^{1/\kappa}}$  implies  $\text{err}_{\bar{\Delta}}(h) - \text{err}_{\bar{\Delta}}(\tilde{h}) \leq (144C\sigma(n, \delta))^{\kappa/(2\kappa-1)}$ . Thus we have

$$\text{err}_{\bar{\Delta}}(h) - \text{err}_{\bar{\Delta}}(\tilde{h}) \leq \max(36\tilde{\epsilon}, 52\sigma(n, \delta), (6400C\sigma(n, \delta))^{\frac{\kappa}{2\kappa-1}})$$

Invoking (19) again, we have that:

$$\rho_{\bar{\Delta}}(h, \tilde{h}) \leq \max(C(36\tilde{\epsilon})^{\frac{1}{\kappa}}, C(52\sigma(n, \delta))^{\frac{1}{\kappa}}, C(6400C\sigma(n, \delta))^{\frac{1}{2\kappa-1}})$$

□

## D Remaining Proofs from Section 2

*Proof.* (Of Lemma 1) Assuming  $E_r$  happens, we prove the lemma by induction.

**Base Case:** For  $k = 1$ , clearly  $h^*(D) \in V_1 = \mathcal{H}$ .

**Inductive Case:** Assume  $h^*(D) \in V_k$ . As we are in the realizable case,  $h^*(D)$  is consistent with the examples  $S_k$  drawn in Step 8 of Algorithm 1; thus  $h^*(D) \in V_{k+1}$ . The lemma follows. □

*Proof.* (Of Lemma 2) We use  $\tilde{h}_k = \operatorname{argmin}_{h \in V_k} \operatorname{err}_{\tilde{\Gamma}_k}(h)$  to denote the optimal classifier in  $V_k$  with respect to the distribution  $\tilde{\Gamma}_k$ . Assuming  $E_a$  happens, we prove the lemma by induction.

**Base Case:** For  $k = 1$ , clearly  $h^*(D) \in V_1 = \mathcal{H}$ .

**Inductive Case:** Assume  $h^* \in V_k$ . In order to show the inductive case, our goal is to show that:

$$\mathbb{P}_{\tilde{\Gamma}_k}(h^*(D)(x) \neq y) - \mathbb{P}_{\tilde{\Gamma}_k}(\tilde{h}_k(x) \neq y) \leq \frac{\epsilon_k}{16\phi_k} \quad (25)$$

If (25) holds, then, by (2.1) of Lemma 4, we know that if Algorithm 2 succeeds when called in iteration  $k$  of Algorithm 1, then, it is guaranteed that  $h^* \in V_{k+1}$ .

We therefore focus on showing (25). First, from Equation (12) of Lemma 9, we have:

$$(\operatorname{err}_{\tilde{U}_k}(h^*(D)) - \operatorname{err}_{\tilde{U}_k}(\tilde{h}_k)) - (\operatorname{err}_D(h^*(D)) - \operatorname{err}_D(\tilde{h}_k)) \leq \frac{\epsilon_k}{32}$$

As  $\operatorname{err}_D(h^*(D)) \leq \operatorname{err}_D(\tilde{h}_k)$ , we get:

$$\operatorname{err}_{\tilde{U}_k}(h^*(D)) \leq \operatorname{err}_{\tilde{U}_k}(\tilde{h}_k) + \frac{\epsilon_k}{32} \quad (26)$$

On the other hand, by Equation (14) of Lemma 10 and triangle inequality,

$$\mathbb{E}_{\tilde{U}_k}[I(\tilde{h}_k(x) \neq y)(1 - \gamma_k(x))] - \mathbb{E}_{\tilde{U}_k}[I(h^*(D)(x) \neq y)(1 - \gamma_k(x))] \quad (27)$$

$$\leq \mathbb{E}_{\tilde{U}_k}[I(h^*(D)(x) \neq \tilde{h}_k(x))(1 - \gamma_k(x))] \leq \frac{\epsilon_k}{32} \quad (28)$$

Combining Equations (26) and (27), we get:

$$\begin{aligned} \mathbb{E}_{\tilde{U}_k}[I(h^*(D)(x) \neq y)\gamma_k(x)] &= \operatorname{err}_{\tilde{U}_k}(h^*(D)(x)) - \mathbb{E}_{\tilde{U}_k}[I(h^*(D)(x) \neq y)(1 - \gamma_k(x))] \\ &\leq \operatorname{err}_{\tilde{U}_k}(\tilde{h}_k(x)) + \epsilon_k/32 - \mathbb{E}_{\tilde{U}_k}[I(h^*(D)(x) \neq y)(1 - \gamma_k(x))] \\ &\leq \mathbb{E}_{\tilde{U}_k}[I(\tilde{h}_k(x) \neq y)\gamma_k(x)] + \mathbb{E}_{\tilde{U}_k}[I(\tilde{h}_k(x) \neq y)(1 - \gamma_k(x))] + \epsilon_k/32 \\ &\quad - \mathbb{E}_{\tilde{U}_k}[I(h^*(D)(x) \neq y)(1 - \gamma_k(x))] \\ &\leq \mathbb{E}_{\tilde{U}_k}[I(\tilde{h}_k(x) \neq y)\gamma_k(x)] + \epsilon_k/16 \end{aligned}$$

Dividing both sides by  $\phi_k$ , we get:

$$\mathbb{P}_{\tilde{\Gamma}_k}(h^*(D)(x) \neq y) - \mathbb{P}_{\tilde{\Gamma}_k}(\tilde{h}_k(x) \neq y) \leq \frac{\epsilon_k}{16\phi_k},$$

from which the lemma follows.  $\square$

*Proof.* (of Lemma 3) Assuming  $E_r$  happens, we prove the lemma by induction.

**Base Case:** For  $k = 1$ , clearly  $\operatorname{err}_D(h) \leq 1 \leq \epsilon_1 = \epsilon 2^{k_0}, \forall h \in V_1 = \mathcal{H}$ .

**Inductive Case:** Note that  $\forall h, h' \in V_{k+1} \subseteq V_k$ , by Equation (14) of Lemma 10, we have:

$$\mathbb{E}_{\tilde{U}_k}[I(h(x) \neq h'(x))(1 - \gamma_k(x))] \leq \frac{\epsilon_k}{8}$$

By the proof of Lemma 1,  $h^*(D) \in V_{k+1}$  on event  $E_r$ , thus  $\forall h \in V_{k+1}$ ,

$$\mathbb{E}_{\tilde{U}_k}[I(h(x) \neq h^*(D)(x))(1 - \gamma_k(x))] \leq \frac{\epsilon_k}{8} \quad (29)$$

Since any  $h \in V_{k+1}$ ,  $h$  is consistent with  $S_k$  of size  $m_k = \frac{1536\phi_k}{\epsilon_k}(d \ln \frac{1536\phi_k}{\epsilon_k} + \ln \frac{48}{\delta_k})$ , we have that for all  $h \in V_{k+1}$ ,

$$\mathbb{P}_{\tilde{\Gamma}_k}(h(x) \neq h^*(D)(x)) \leq \frac{\epsilon_k}{8\phi_k}$$

That is,

$$\mathbb{E}_{\tilde{U}_k}[I(h(x) \neq h^*(D)(x))\gamma_k(x)] \leq \frac{\epsilon_k}{8}$$

Combining this with Equation (29) above,

$$\mathbb{P}_{\tilde{U}_k}(h(x) \neq h^*(D)(x)) \leq \frac{\epsilon_k}{4}$$

By Equation (11) of Lemma 9,

$$\mathbb{P}_D(h(x) \neq h^*(D)(x)) \leq \frac{\epsilon_k}{2} = \epsilon_{k+1}$$

The lemma follows.  $\square$



*Proof.* (of Lemma 6) Assuming  $E_a$  happens, we prove the lemma by induction.

**Base Case:** For  $k = 1$ , clearly  $\text{err}_D(h) - \text{err}_D(h^*(D)) \leq 1 \leq \epsilon_1 = \epsilon 2^{k_0}, \forall h \in V_1 = \mathcal{H}$ .

**Inductive Case:** Note that  $\forall h, h' \in V_{k+1} \subseteq V_k$ , by Equation (14) of Lemma 10,

$$\mathbb{E}_{\tilde{U}_k}[I(h(x) \neq y)(1 - \gamma_k(x))] - \mathbb{E}_{\tilde{U}_k}[I(h'(D)(x) \neq y)(1 - \gamma_k(x))] \leq \mathbb{E}_{\tilde{U}_k}[I(h(x) \neq h'(D)(x))(1 - \gamma_k(x))] \leq \frac{\epsilon_k}{8}$$

From Lemma 2,  $h^*(D) \in V_k$  whenever the event  $E_a$  happens. Thus  $\forall h \in V_{k+1}$ ,

$$\mathbb{E}_{\tilde{U}_k}[I(h(x) \neq y)(1 - \gamma_k(x))] - \mathbb{E}_{\tilde{U}_k}[I(h^*(D)(x) \neq y)(1 - \gamma_k(x))] \leq \frac{\epsilon_k}{8} \quad (30)$$

On the other hand, if Algorithm 2 succeeds with target excess error  $\frac{\epsilon_k}{8\phi_k}$ , by item(2.2) of Lemma 4, for any  $h \in V_{k+1}$ ,

$$\mathbb{P}_{\tilde{\Gamma}_k}(h(x) \neq y) - \min_{h \in V_k} \mathbb{P}_{\tilde{\Gamma}_k}(h(x) \neq y) \leq \frac{\epsilon_k}{8\phi_k}$$

Moreover, as  $h^*(D) \in V_k$  from Lemma 2,

$$\mathbb{P}_{\tilde{\Gamma}_k}(h(x) \neq y) - \mathbb{P}_{\tilde{\Gamma}_k}(h^*(D)(x) \neq y) \leq \frac{\epsilon_k}{8\phi_k}$$

In other words,

$$\mathbb{E}_{\tilde{U}_k}[I(h(x) \neq y)\gamma_k(x)] - \mathbb{E}_{\tilde{U}_k}[I(h^*(D)(x) \neq y)\gamma_k(x)] \leq \frac{\epsilon_k}{8}$$

Combining this with Equation (30), we get that for all  $h \in V_{k+1}$ ,

$$\mathbb{P}_{\tilde{U}_k}(h(x) \neq y) - \mathbb{P}_{\tilde{U}_k}(h^*(D)(x) \neq y) \leq \frac{\epsilon_k}{4}$$

Finally, combining this with Equation (12) of Lemma 9, we have that:

$$\mathbb{P}_D(h(x) \neq y) - \mathbb{P}_D(h^*(D)(x) \neq y) \leq \frac{\epsilon_k}{2} = \epsilon_{k+1}$$

The lemma follows.  $\square$

*Proof.* (of Theorem 1) In the realizable case, We observe that for example  $z_i, \zeta_i = \mathbb{P}(P(z_i) = -1)$ ,  $\xi_i = \mathbb{P}(P(z_i) = 1)$ , and  $\gamma_i = \mathbb{P}(P(z_i) = 0)$ . Suppose  $h^* \in \mathcal{H}$  is the true hypothesis which has 0 error with respect to the data distribution. By the realizability assumption,  $h^* \in V$ . Moreover,  $\mathbb{P}_U(P(x) \neq h^*(x), P(x) \neq 0) = \frac{1}{m}(\sum_{i: h^*(z_i)=+1} \zeta_i + \sum_{i: h^*(z_i)=-1} \xi_i) \leq \eta$  by Algorithm 3.

In the non-realizable case, we still have  $\mathbb{P}_{x \sim U}(h^*(x) \neq P(x), P(x) \neq 0) \leq \eta$ , hence by triangle inequality,  $\mathbb{P}_{x \sim U}(P(x) \neq x, P(x) \neq 0) - \mathbb{P}_{x \sim U}(h^*(x) \neq y, P(x) \neq 0) \leq \eta$ . Thus

$$\mathbb{P}_{x \sim U}(P(x) \neq y, P(x) \neq 0) \leq \mathbb{P}_{x \sim U}(h^*(x) \neq y) + \eta$$

$\square$

*Proof.* (of Theorem 2) Suppose  $P'$  assigns probabilities  $\{[\xi'_i, \zeta'_i, \gamma'_i], i = 1, \dots, m\}$  to the unlabelled examples  $z_i$ , and suppose for the sake of contradiction that  $\sum_{i=1}^m \xi'_i + \zeta'_i > \sum_{i=1}^m \xi_i + \zeta_i$ . Then,  $\{\xi'_i, \zeta'_i, \gamma'_i\}$ 's cannot satisfy the LP in Algorithm 3, and thus there exists some  $h' \in V$  for which constraint (2) is violated. The true hypothesis that generates the data could be any  $h \in V$ ; if this true hypothesis is  $h'$ , then  $\mathbb{P}_{x \sim U}(P'(x) \neq h'(x), P'(x) \neq 0) > \delta$ .  $\square$

## E Proofs from Section 3

*Proof.* (of Theorem 4)

(1) In the realizable case, suppose that event  $E_r$  happens. Then from Equation (15) of Lemma 10, while running Algorithm 3, we have that:

$$\phi_k \leq \Phi_D(V_k, \frac{\epsilon_k}{128}) + \frac{\epsilon_k}{256} \leq \Phi_D(B_D(h^*, \epsilon_k), \frac{\epsilon_k}{128}) + \frac{\epsilon_k}{256} \leq \Phi_D(B_D(h^*, \epsilon_k), \frac{\epsilon_k}{256}) = \phi(\epsilon_k, \frac{\epsilon_k}{256})$$

where the second inequality follows from the fact that  $V_k \subseteq B_D(h^*(D), \epsilon_k)$ , and third inequality follows from Lemma 18 and denseness assumption.

Thus, there exists  $c_3 > 0$  such that, in round  $k$ ,

$$m_k = (d \ln \frac{1536\phi_k}{\epsilon_k} + \ln \frac{48}{\delta_k}) \frac{1536\phi_k}{\epsilon_k} \leq c_3 (d \ln \frac{\phi(\epsilon_k, \epsilon_k/256)}{\epsilon_k} + \ln(\frac{k_0 - k + 1}{\delta})) \frac{\phi(\epsilon_k, \epsilon_k/256)}{\epsilon_k}$$

Hence the total number of labels queried by Algorithm 1 is at most

$$\sum_{k=1}^{\lceil \log \frac{1}{\epsilon} \rceil} m_k \leq c_3 \sum_{k=1}^{\lceil \log \frac{1}{\epsilon} \rceil} (d \ln \frac{\phi(\epsilon_k, \epsilon_k/256)}{\epsilon_k} + \ln(\frac{k_0 - k + 1}{\delta})) \frac{\phi(\epsilon_k, \epsilon_k/256)}{\epsilon_k}$$

(2) In the agnostic case, suppose the event  $E_a$  happens.

First, given  $E_a$ , from Equation (15) of Lemma 10 when running Algorithm 3,

$$\phi_k \leq \Phi_D(V_k, \frac{\epsilon_k}{128}) + \frac{\epsilon_k}{256} \leq \Phi_D(B_D(h^*, 2\nu^*(D) + \epsilon_k), \frac{\epsilon_k}{256}) = \phi(2\nu^*(D) + \epsilon_k, \frac{\epsilon_k}{256}) \quad (31)$$

where the second inequality follows from the fact that  $V_k \subseteq B_D(h^*(D), 2\nu^*(D) + \epsilon_k)$  and the third inequality follows from Lemma 18 and denseness assumption.

Second, recall that  $\tilde{h}_k = \operatorname{argmin}_{h \in V_k} \operatorname{err}_{\tilde{\Gamma}_k}(h)$ ,

$$\begin{aligned} \operatorname{err}_{\tilde{\Gamma}_k}(\tilde{h}_k) &= \min_{h \in V_k} \operatorname{err}_{\tilde{\Gamma}_k}(h) \\ &\leq \operatorname{err}_{\tilde{\Gamma}_k}(h^*(D)) \\ &= \frac{\mathbb{E}_{\tilde{U}_k}[I(h^*(D)(x) \neq y)\gamma_k(x)]}{\phi_k} \\ &\leq \frac{\mathbb{P}_{\tilde{U}_k}(h^*(D)(x) \neq y)}{\phi_k} \\ &\leq \frac{\nu^*(D) + \epsilon_k/64}{\phi_k} \end{aligned}$$

Here the first inequality follows from the suboptimality of  $h^*(D)$  under distribution  $\tilde{\Gamma}_k$ , the second inequality follows from  $\gamma_k(x) \leq 1$ , and the third inequality follows from Equation (11).

Thus, conditioned on  $E_a$ , in iteration  $k$ , Algorithm 2 succeeds by Lemma 5, and there exists a constant  $c_4 > 0$  such that the number of labels queried is

$$\begin{aligned} m_k &\leq c_1 \frac{\frac{\epsilon_k}{8\phi_k} + \operatorname{err}_{\tilde{\Gamma}_k}(\tilde{h}_k)}{(\frac{\epsilon_k}{8\phi_k})^2} (d \ln \frac{1}{\frac{\epsilon_k}{8\phi_k}} + \ln \frac{2}{\delta_k}) \\ &\leq c_4 (d \ln \frac{\phi(2\nu^*(D) + \epsilon_k, \epsilon_k/256)}{\epsilon_k} + \ln(\frac{k_0 - k + 1}{\delta})) \frac{\phi(2\nu^*(D) + \epsilon_k, \epsilon_k/256)}{\epsilon_k} (1 + \frac{\nu^*(D)}{\epsilon_k}) \end{aligned}$$

Here the last line follows from Equation (31). Hence the total number of examples queried is at most:

$$\sum_{k=1}^{\lceil \log \frac{1}{\epsilon} \rceil} m_k \leq c_4 \sum_{k=1}^{\lceil \log \frac{1}{\epsilon} \rceil} (d \ln \frac{\phi(2\nu^*(D) + \epsilon_k, \epsilon_k/256)}{\epsilon_k} + \ln(\frac{k_0 - k + 1}{\delta})) \frac{\phi(2\nu^*(D) + \epsilon_k, \epsilon_k/256)}{\epsilon_k} (1 + \frac{\nu^*(D)}{\epsilon_k})$$

□

*Proof.* (of Theorem 5) Assume  $E_a$  happens.

First, from Equation (15) of Lemma 10 when running Algorithm 3,

$$\phi_k \leq \Phi_D(V_k, \frac{\epsilon_k}{128}) + \frac{\epsilon_k}{256} \leq \Phi_D(B_D(h^*, C_0\epsilon_k^{\frac{1}{\kappa}}), \frac{\epsilon_k}{128}) + \frac{\epsilon_k}{256} \leq \Phi_D(B_D(h^*, C_0\epsilon_k^{\frac{1}{\kappa}}), \frac{\epsilon_k}{256}) = \phi(C_0\epsilon_k^{\frac{1}{\kappa}}, \frac{\epsilon_k}{256}) \quad (32)$$

where the second inequality follows from the fact that  $V_k \subseteq B_D(h^*(D), C_0\epsilon_k^{\frac{1}{\kappa}})$ , and the third inequality follows from Lemma 18 and denseness assumption.

Second, for all  $h \in V_k$ ,

$$\begin{aligned}
& \phi_k \rho_{\tilde{\Gamma}_k}(h, h^*(D)) \\
&= \mathbb{E}_{\tilde{U}_k} [I(h(x) \neq h^*(D)(x)) \gamma_k(x)] \\
&\leq \rho_{\tilde{U}_k}(h, h^*(D)) \\
&\leq \rho_D(h, h^*(D)) + \epsilon_k/32 \\
&\leq C_0(\text{err}_D(h) - \text{err}_D(h^*(D)))^{\frac{1}{\kappa}} + \epsilon_k/32 \\
&\leq C_0(\text{err}_{\tilde{U}_k}(h) - \text{err}_{\tilde{U}_k}(h^*(D)))^{\frac{1}{\kappa}} + \epsilon_k/64)^{\frac{1}{\kappa}} + \epsilon_k/32 \\
&= C_0(\mathbb{E}_{\tilde{U}_k}[I(h(x) \neq y) \gamma_k(x)] - \mathbb{E}_{\tilde{U}_k}[I(h^*(D)(x) \neq y) \gamma_k(x)] \\
&\quad + \mathbb{E}_{\tilde{U}_k}[I(h(x) \neq y)(1 - \gamma_k(x))] - \mathbb{E}_{\tilde{U}_k}[I(h^*(D)(x) \neq y)(1 - \gamma_k(x))] + \epsilon_k/16)^{\frac{1}{\kappa}} + \epsilon_k/32
\end{aligned}$$

Here the first inequality follows from  $\gamma_k(x) \leq 1$ , the second inequality follows from Equation (13) of Lemma 9, the third inequality follows from Definition 1 and the fourth inequality follows from Equation (12) of Lemma 9. The above can be upper bounded by:

$$\begin{aligned}
&\leq C_0(\mathbb{E}_{\tilde{U}_k}[I(h(x) \neq y) \gamma_k(x)] - \mathbb{E}_{\tilde{U}_k}[I(h^*(D)(x) \neq y) \gamma_k(x)] + \epsilon_k/16)^{\frac{1}{\kappa}} + \epsilon_k/32 \\
&\leq 2C_0(\mathbb{E}_{\tilde{U}_k}[I(h(x) \neq y) \gamma_k(x)] - \mathbb{E}_{\tilde{U}_k}[I(h^*(D)(x) \neq y) \gamma_k(x)])^{\frac{1}{\kappa}} + 2C_0(\epsilon_k/16)^{\frac{1}{\kappa}} + \epsilon_k/32 \\
&\leq \max(8C_0, 4) \max((\mathbb{E}_{\tilde{U}_k}[I(h(x) \neq y) \gamma_k(x)] - \mathbb{E}_{\tilde{U}_k}[I(h^*(D)(x) \neq y) \gamma_k(x)]), \frac{\epsilon_k}{16})^{\frac{1}{\kappa}} \\
&= \max(8C_0, 4) (\phi_k)^{\frac{1}{\kappa}} \max(\mathbb{P}_{\tilde{\Gamma}_k}(h(x) \neq y) - \mathbb{P}_{\tilde{\Gamma}_k}(h^*(D)(x) \neq y), \frac{\epsilon_k}{8\phi_k})^{\frac{1}{\kappa}}
\end{aligned}$$

Here the first inequality follows from Equation (14) of Lemma 10 and triangle inequality  $\mathbb{E}_{\tilde{U}_k}[I(h(x) \neq y) \gamma_k(x)] - \mathbb{E}_{\tilde{U}_k}[I(h^*(D)(x) \neq y) \gamma_k(x)] \leq \mathbb{E}_{\tilde{U}_k}[I(h(x) \neq h^*(D)(x)) \gamma_k(x)] \leq \epsilon_k/32$ , and the last two inequalities follow from simple algebra.

Dividing both sides by  $\phi_k$ , we get:

$$\rho_{\tilde{\Gamma}_k}(h, h^*(D)) \leq C_1 (\phi_k)^{\frac{1}{\kappa}-1} \max(\text{err}_{\tilde{\Gamma}_k}(h) - \text{err}_{\tilde{\Gamma}_k}(h^*(D)), \frac{\epsilon_k}{8\phi_k})^{\frac{1}{\kappa}}$$

where  $C_1 = \max(8C_0, 4)$ . Thus in iteration  $k$ , Condition (19) in Lemma 11 holds with  $C := C_1 (\phi_k)^{\frac{1}{\kappa}-1}$  and  $\tilde{h} := h^*(D)$ . Thus, from Lemma 11, Algorithm 2 succeeds, and there exists a constant  $c_5 > 0$ , such that the number of labels queried is

$$\begin{aligned}
m_k &\leq c_2 \max((d \ln(C_1 (\phi_k)^{\frac{1}{\kappa}-1} (\frac{\epsilon_k}{8\phi_k})^{\frac{1}{\kappa}-2}) + \ln \frac{2}{\delta_k}) (C_1 (\phi_k)^{\frac{1}{\kappa}-1} (\frac{\epsilon_k}{8\phi_k})^{\frac{1}{\kappa}-2}), \\
&\quad (d \ln(\frac{\epsilon_k}{8\phi_k})^{-1} + \ln \frac{2}{\delta_k}) (\frac{\epsilon_k}{8\phi_k})^{-1}) \\
&\leq c_5 (d \ln(\phi_k \epsilon_k^{\frac{1}{\kappa}-2}) + \ln(\frac{k_0 - k + 1}{\delta})) \phi_k \epsilon_k^{\frac{1}{\kappa}-2} \\
&\leq c_5 (d \ln(\phi(C_0 \epsilon_k^{\frac{1}{\kappa}}, \frac{\epsilon_k}{256}) \epsilon_k^{\frac{1}{\kappa}-2}) + \ln(\frac{k_0 - k + 1}{\delta})) \phi(C_0 \epsilon_k^{\frac{1}{\kappa}}, \frac{\epsilon_k}{256}) \epsilon_k^{\frac{1}{\kappa}-2}
\end{aligned}$$

Where the last line follows from Equation (31). Hence the total number of examples queried is at most

$$\sum_{k=1}^{\lceil \log \frac{1}{\epsilon} \rceil} m_k \leq c_5 \sum_{k=1}^{\lceil \log \frac{1}{\epsilon} \rceil} (d \ln(\phi(C_0 \epsilon_k^{\frac{1}{\kappa}}, \frac{\epsilon_k}{256}) \epsilon_k^{\frac{1}{\kappa}-2}) + \ln(\frac{k_0 - k + 1}{\delta})) \phi(C_0 \epsilon_k^{\frac{1}{\kappa}}, \frac{\epsilon_k}{256}) \epsilon_k^{\frac{1}{\kappa}-2}$$

□

The following lemma is an immediate corollary of Theorem 21, item (a) of Lemma 2 and Lemma 3 of [4]:

**Lemma 14.** Suppose  $D$  is isotropic and log-concave on  $\mathbb{R}^d$ , and  $\mathcal{H}$  is the set of homogeneous linear classifiers on  $\mathbb{R}^d$ , then there exist absolute constants  $c_6, c_7 > 0$  such that  $\phi(r, \eta) \leq c_6 r \ln \frac{c_7 r}{\eta}$ .

*Proof.* (of Lemma 14) Denote  $w_h$  as the unit vector  $w$  such that  $h(x) = \text{sign}(w \cdot x)$ , and  $\theta(w, w')$  to be the angle between vectors  $w$  and  $w'$ . If  $h \in B_D(h^*, r)$ , then by Lemma 3 of [4], there exists some constant  $c_{11} > 0$  such that  $\theta(w_h, w_{h^*}) \leq \frac{r}{c_{11}}$ . Also, by Lemma 21 of [4], there exists some constants  $c_{12}, c_{13} > 0$ , such that, if  $\theta(w, w') = \alpha$  then

$$\mathbb{P}_D(\text{sign}(w \cdot x) \neq \text{sign}(w' \cdot x), |w \cdot x| \geq b) \leq c_{12} \alpha \exp(-c_{13} \frac{b}{\alpha})$$

We define a special solution  $(\xi, \zeta, \gamma)$  as follows:

$$\begin{aligned} \xi(x) &:= I(w_{h^*} \cdot x \geq \frac{r}{c_{11} c_{13}} \ln \frac{c_{12} r}{c_{11} \eta}) \\ \zeta(x) &:= I(w_{h^*} \cdot x \leq -\frac{r}{c_{11} c_{13}} \ln \frac{c_{12} r}{c_{11} \eta}) \\ \gamma(x) &:= I(|w_{h^*} \cdot x| \leq \frac{r}{c_{11} c_{13}} \ln \frac{c_{12} r}{c_{11} \eta}) \end{aligned}$$

Then it can be checked that for all  $h \in B_D(h^*, r)$ ,

$$\mathbb{E}[I(h(x) = +1)\zeta(x) + I(h(x) = -1)\xi(x)] = \mathbb{P}_D(\text{sign}(w_{h^*} \cdot x) \neq \text{sign}(w_h \cdot x), |w_{h^*} \cdot x| \geq \frac{r}{c_{11} c_{13}} \ln \frac{c_{12} r}{c_{11} \eta}) \leq \eta$$

And by item (a) of Lemma 2 of [4], we have

$$\mathbb{E}\gamma(x) = \mathbb{P}_D(|w_{h^*} \cdot x| \leq \frac{r}{c_{11} c_{13}} \ln \frac{c_{12} r}{c_{11} \eta}) \leq \frac{r}{c_{11} c_{13}} \ln \frac{c_{12} r}{c_{11} \eta}$$

Hence,

$$\phi(r, \eta) \leq \frac{r}{c_{11} c_{13}} \ln \frac{c_{12} r}{c_{11} \eta}$$

□

*Proof.* (of Corollary 1) This is an immediate consequence of Lemma 14 and Theorems 4 and 5 and algebra. □

## F A Suboptimal Alternative to Algorithm 2

---

**Algorithm 4** An Nonadaptive Algorithm for Label Query Given Target Excess Error

---

- 1: **Inputs:** Hypothesis set  $V$  of VC dimension  $d$ , Example distribution  $\Delta$ , Labeling oracle  $\mathcal{O}$ , target excess error  $\tilde{\epsilon}$ , target confidence  $\tilde{\delta}$ .
- 2: Draw  $n = \frac{12288}{\tilde{\epsilon}^2} (d \ln \frac{12288}{\tilde{\epsilon}^2} + \ln \frac{24}{\tilde{\delta}})$  i.i.d examples from  $\Delta$ ; query their labels from  $\mathcal{O}$  to get a labelled dataset  $S$ .
- 3: Train an ERM classifier  $\hat{h} \in V$  over  $S$ .
- 4: Define the set  $V$  as follows:

$$V_1 = \left\{ h \in V : \text{err}_S(h) \leq \text{err}_S(\hat{h}) + \frac{3\tilde{\epsilon}}{4} \right\}$$

- 5: **return**  $V_1$ .
- 

It is immediate that we have the following lemma.

**Lemma 15.** Suppose we run Algorithm 4 with inputs hypothesis set  $V$ , example distribution  $\Delta$ , labelling oracle  $\mathcal{O}$ , target excess error  $\tilde{\epsilon}$  and target confidence  $\tilde{\delta}$ . Then there exists an event  $\tilde{E}$ ,  $\mathbb{P}(\tilde{E}) \geq 1 - \tilde{\delta}$ , such that on  $\tilde{E}$ , the set  $V_1$  has the following property. (1) If for  $h \in \mathcal{H}$ ,  $\text{err}_{\tilde{\Delta}}(h) - \text{err}_{\tilde{\Delta}}(h^*(\tilde{\Delta})) \leq \tilde{\epsilon}/2$ , then  $h \in V_1$ . (2) On the other hand, if  $h \in V_1$ , then  $\text{err}_{\tilde{\Delta}}(h) - \text{err}_{\tilde{\Delta}}(h^*(\tilde{\Delta})) \leq \tilde{\epsilon}$ .

When  $\tilde{E}$  happens, we say that Algorithm 4 succeeds.

*Proof.* By Equation (9) of Lemma 8 and because  $n = \frac{12288}{\tilde{\epsilon}^2}(d \ln \frac{12288}{\tilde{\epsilon}^2} + \ln \frac{24}{\tilde{\delta}})$ , we have for all  $h, h' \in \mathcal{H}$ ,

$$(\text{err}_{\tilde{\Delta}}(h) - \text{err}_{\tilde{\Delta}}(h')) - (\text{err}_S(h) - \text{err}_S(h')) \leq \frac{\tilde{\epsilon}}{4}$$

For the proof of (1), for any  $h \in V$ ,  $\text{err}_{\tilde{\Delta}}(h) - \text{err}_{\tilde{\Delta}}(h^*(\tilde{\Delta})) \leq \tilde{\epsilon}/2$ , then

$$\text{err}_{\tilde{\Delta}}(h) - \text{err}_{\tilde{\Delta}}(\hat{h}) \leq \tilde{\epsilon}/2$$

Thus

$$\text{err}_S(h) - \text{err}_S(\hat{h}) \leq \frac{3\tilde{\epsilon}}{4}$$

proving  $h \in V_1$ .

For the proof of (2), for any  $h \in V_1$ ,

$$\text{err}_S(h) - \text{err}_S(h') \leq \frac{3\tilde{\epsilon}}{4}$$

Thus

$$\text{err}_S(h) - \text{err}_S(h^*(\tilde{\Delta})) \leq \frac{3\tilde{\epsilon}}{4}$$

Combining with the fact that  $(\text{err}_{\tilde{\Delta}}(h) - \text{err}_{\tilde{\Delta}}(h^*(\tilde{\Delta}))) - (\text{err}_S(h) - \text{err}_S(h^*(\tilde{\Delta}))) \leq \frac{\tilde{\epsilon}}{4}$  we have

$$\text{err}_{\tilde{\Delta}}(h) - \text{err}_{\tilde{\Delta}}(h^*(\tilde{\Delta})) \leq \tilde{\epsilon}$$

□

**Corollary 2.** Suppose we replace the calls to Algorithm 2 with Algorithm 4 in Algorithm 1, then run it with inputs example oracle  $\mathcal{U}$ , labelling oracle  $\mathcal{O}$ , hypothesis class  $V$ , confidence-rated predictor  $P$  of Algorithm 3, target excess error  $\epsilon$  and target confidence  $\delta$ . Then the modified algorithm has a label complexity of

$$\tilde{O}\left(\sum_{k=1}^{\lceil \log 1/\epsilon \rceil} (d(\frac{\phi(2\nu^*(D) + \epsilon_k, \epsilon_k/256)}{\epsilon_k})^2)\right)$$

in the agnostic case and

$$\tilde{O}\left(\sum_{k=1}^{\lceil \log 1/\epsilon \rceil} d\left(\frac{\phi(C_0\epsilon_k^{\frac{1}{\kappa}}, \frac{\epsilon_k}{256})}{\epsilon_k^{\frac{1}{\kappa}}}\right)^2 \epsilon_k^{\frac{2}{\kappa}-2}\right)$$

under  $(C_0, \kappa)$ -Tsybakov Noise Condition.

Under denseness assumption, by Lemma 17, we have  $\phi(r, \eta) \geq r - 2\eta$ , the label complexity bounds given by Corollary 2 is always no better than the ones given by Theorem 4 and 5.

*Proof.* (Sketch) Define event

$E_a = \{\text{For all } k = 1, 2, \dots, k_0: \text{Equations (11), (12), (13), (14), (15) hold for } \tilde{U}_k \text{ with confidence } \delta_k/2, \text{ and Algorithm 4 succeeds with inputs hypothesis set } V = V_k, \text{ example}$

distribution  $\Delta = \Gamma_k$ , labelling oracle  $\mathcal{O}$ , target excess error  $\tilde{\epsilon} = \frac{\epsilon_k}{8\phi_k}$  and target confidence  $\tilde{\delta} = \frac{\delta_k}{2}\}$ .

Clealy,  $\mathbb{P}(E_a) \geq 1 - \delta$ . On the event  $E_a$ , there exists an absolute constant  $c_{13} > 0$ , such that the number of examples queried in iteration  $k$  is

$$m_k \leq c_{13}(d \ln \frac{8\phi_k}{\epsilon_k} + \ln \frac{2}{\tilde{\delta}})(\frac{8\phi_k}{\epsilon_k})^2$$

Combining it with Equation (15) of Lemma 10

$$\phi_k \leq \Phi_D(V_k, \frac{\epsilon_k}{128}) + \frac{\epsilon_k}{256}$$

we have

$$m_k \leq O((d \ln \frac{\Phi_D(V_k, \frac{\epsilon_k}{128}) + \frac{\epsilon_k}{256}}{\epsilon_k} + \ln \frac{2}{\delta_k})(\frac{\Phi_D(V_k, \frac{\epsilon_k}{128}) + \frac{\epsilon_k}{256}}{\epsilon_k})^2)$$

The rest of the proof follows from Lemma 18 and denseness assumption, along with algebra. □

## G Proofs of Concentration Lemmas

*Proof.* (of Lemma 9) We begin by observing that:

$$\text{err}_{\tilde{U}_k}(h) = \frac{1}{n_k} \sum_{i=1}^{n_k} [\mathbb{P}_D(Y = +1|X = x_i)I(h(x_i) = -1) + \mathbb{P}_D(Y = -1|X = x_i)I(h(x_i) = +1)]$$

Moreover,  $\max(\mathcal{S}(\{I(h(x) = 1, h \in \mathcal{H})\}, n), \mathcal{S}(\{I(h(x) = -1, h \in \mathcal{H})\}, n)) \leq (\frac{en}{d})^d$ . Combining this fact with Lemma 16, the following equations hold simultaneously with probability  $1 - \delta_k/6$ :

$$\left| \frac{1}{n_k} \sum_{i=1}^{n_k} \mathbb{P}_D(Y = +1|X = x_i)I(h(x_i) = -1) - \mathbb{P}_D(h(x) = -1, y = +1) \right| \leq \sqrt{\frac{16(d \ln \frac{en_k}{d} + \ln \frac{24}{\delta_k})}{n_k}} \leq \frac{\epsilon_k}{128}$$

$$\left| \frac{1}{n_k} \sum_{i=1}^{n_k} \mathbb{P}_D(Y = -1|X = x_i)I(h(x_i) = +1) - \mathbb{P}_D(h(x) = +1, y = -1) \right| \leq \sqrt{\frac{16(d \ln \frac{en_k}{d} + \ln \frac{24}{\delta_k})}{n_k}} \leq \frac{\epsilon_k}{128}$$

Thus Equation (11) holds with probability  $1 - \delta_k/6$ . Moreover, we observe that Equation (11) implies Equation (12). To show Equation (13), we observe that by Lemma 8, with probability  $1 - \delta_k/12$ ,

$$|\rho_D(h, h') - \rho_{\tilde{U}_k}(h, h')| = |\rho_D(h, h') - \rho_{S_k}(h, h')| \leq 2\sqrt{\sigma(n_k, \delta_k/12)} \leq \frac{\epsilon_k}{64}$$

Thus, Equation (13) holds with probability  $\geq 1 - \delta_k/12$ . By union bound, with probability  $1 - \delta_k/4$ , Equations (11), (12), and (13) hold simultaneously.  $\square$

*Proof.* (of Lemma 10) (1) Given a confidence-rated predictor with inputs hypothesis set  $V_k$ , unlabelled data  $U_k$ , and error bound  $\epsilon_k/64$ , the outputs  $\{(\xi_{k,i}, \zeta_{k,i}, \gamma_{k,i})\}_{i=1}^{n_k}$  must satisfy that for all  $h, h' \in V_k$ ,

$$\frac{1}{n_k} \sum_{i=1}^{n_k} [I(h(x_{k,i}) = -1)\xi_{k,i} + I(h(x_{k,i}) = +1)\zeta_{k,i}] \leq \frac{\epsilon_k}{64}$$

$$\frac{1}{n_k} \sum_{i=1}^{n_k} [I(h'(x_{k,i}) = -1)\xi_{k,i} + I(h'(x_{k,i}) = +1)\zeta_{k,i}] \leq \frac{\epsilon_k}{64}$$

Since  $I(h(x) \neq h'(x)) \leq \min(I(h(x) = -1) + I(h'(x) = -1), I(h(x) = +1) + I(h'(x) = +1))$ , adding up the two inequalities above, we get

$$\frac{1}{n_k} \sum_{i=1}^{n_k} [I(h(x_{k,i}) \neq h'(x_{k,i}))(\xi_{k,i} + \zeta_{k,i})] \leq \frac{\epsilon_k}{32}$$

That is,

$$\frac{1}{n_k} \sum_{i=1}^{n_k} [I(h(x_{k,i}) \neq h'(x_{k,i}))(1 - \gamma_{k,i})] \leq \frac{\epsilon_k}{32}$$

(2) By definition of  $\Phi_D(V, \eta)$ , there exist nonnegative functions  $\xi, \zeta, \gamma$  such that  $\xi(x) + \zeta(x) + \gamma(x) \equiv 1$ ,  $\mathbb{E}_D[\gamma(x)] = \Phi_D(V_k, \epsilon_k/128)$  and for all  $h \in V_k$ ,

$$\mathbb{E}_D[\xi(x)I(h(x) = -1) + \zeta(x)I(h(x) = +1)] \leq \frac{\epsilon_k}{128}$$

Consider the linear program in Algorithm 3 with inputs hypothesis set  $V_k$ , unlabelled data  $U_k$ , and error bound  $\epsilon_k/64$ . We consider the following special (but possibly non-optimal) solution for this LP:  $\xi_{k,i} = \xi(z_{k,i})$ ,  $\zeta_{k,i} = \zeta(z_{k,i})$ ,  $\gamma_{k,i} = \gamma(z_{k,i})$ . We will now show that this solution is feasible and has coverage  $\Phi_D(V_k, \epsilon_k/128)$  plus  $O(\epsilon_k)$  with high probability.

Observe that  $\max(\mathcal{S}(\{I(h(x) = 1, h \in \mathcal{H})\}, n), \mathcal{S}(\{I(h(x) = -1, h \in \mathcal{H})\}, n)) \leq (\frac{en}{d})^d$ . Therefore, from Lemma 16 and the union bound, with probability  $1 - \delta_k/4$ , the following hold simultaneously for all  $h \in \mathcal{H}$ :

$$\left| \frac{1}{n_k} \sum_{i=1}^{n_k} \gamma(z_{k,i}) - \mathbb{E}_D \gamma(x) \right| \leq \sqrt{\frac{\ln \frac{2}{\delta_k}}{2n_k}} \leq \frac{\epsilon_k}{256} \quad (33)$$

$$\left| \frac{1}{n_k} \sum_{i=1}^{n_k} \xi(z_{k,i}) I(h(z_{k,i}) = -1) - \mathbb{E}_D[\xi(x) I(h(x) = -1)] \right| \leq \sqrt{\frac{8(d \ln \frac{en_k}{d} + \ln \frac{24}{\delta_k})}{n_k}} \leq \frac{\epsilon_k}{256} \quad (34)$$

$$\left| \frac{1}{n_k} \sum_{i=1}^{n_k} \zeta(z_{k,i}) I(h(z_{k,i}) = +1) - \mathbb{E}_D[\zeta(x) I(h(x) = +1)] \right| \leq \sqrt{\frac{8(d \ln \frac{en_k}{d} + \ln \frac{24}{\delta_k})}{n_k}} \leq \frac{\epsilon_k}{256} \quad (35)$$

Adding up Equations (34) and (35),

$$\left| \frac{1}{n_k} \sum_{i=1}^{n_k} [\zeta(x_i) I(h(x_i) = +1) + \xi(x_i) I(h(x_i) = -1)] - \mathbb{E}_D[\xi(x) I(h(x) = -1) + \zeta(x) I(h(x) = +1)] \right| \leq \frac{\epsilon_k}{128}$$

Thus  $\{(\xi(z_{k,i}), \zeta(z_{k,i}))\}_{i=1}^{n_k}$  is a feasible solution of the linear program of Algorithm 3. Also, by Equation (33),  $\frac{1}{n_k} \sum_{i=1}^{n_k} \gamma(z_{k,i}) \leq \Phi_D(V_k, \frac{\epsilon_k}{128}) + \frac{\epsilon_k}{64}$ . Thus, the outputs  $\{(\xi_{k,i}, \zeta_{k,i}, \gamma_{k,i})\}_{i=1}^{n_k}$  of the linear program in Algorithm 3 satisfy

$$\phi_k = \frac{1}{n_k} \sum_{i=1}^{n_k} \gamma_{k,i} \leq \frac{1}{n_k} \sum_{i=1}^{n_k} \gamma(z_{k,i}) \leq \Phi_D(V_k, \frac{\epsilon_k}{128}) + \frac{\epsilon_k}{256}$$

due to their optimality.  $\square$

**Lemma 16.** *Pick any  $n \geq 1$ ,  $\delta \in (0, 1)$ , a family  $\mathcal{F}$  of functions  $f : \mathcal{Z} \rightarrow \{0, 1\}$ , a fixed weighting function  $w : \mathcal{Z} \rightarrow [0, 1]$ . Let  $S_n$  be a set of  $n$  iid copies of  $Z$ . The following holds with probability at least  $1 - \delta$ :*

$$\left| \frac{1}{n} \sum_{i=1}^n w(z_i) f(z_i) - \mathbb{E}[w(z) f(z)] \right| \leq \sqrt{\frac{16(\ln \mathcal{S}(\mathcal{F}, n) + \ln \frac{2}{\delta})}{n}}$$

where  $\mathcal{S}(\mathcal{F}, n) = \max_{z_1, \dots, z_n \in \mathcal{Z}} |\{(f(z_1), \dots, f(z_n)) : f \in \mathcal{F}\}|$  is the growth function of  $\mathcal{F}$ .

*Proof.* The proof is fairly standard, and follows immediately from the proof of additive VC bounds. With probability  $1 - \delta$ ,

$$\begin{aligned} & \sup_{f \in \mathcal{F}} \left| \frac{1}{n} \sum_{i=1}^n w(z_i) f(z_i) - \mathbb{E} w(z) f(z) \right| \\ & \leq \mathbb{E}_{S \sim D^n} \sup_{f \in \mathcal{F}} \left| \frac{1}{n} \sum_{i=1}^n w(z_i) f(z_i) - \mathbb{E} w(z) f(z) \right| + \sqrt{\frac{2 \ln \frac{1}{\delta}}{n}} \\ & \leq \mathbb{E}_{S \sim D^n, S' \sim D^n} \sup_{f \in \mathcal{F}} \left| \frac{1}{n} \sum_{i=1}^n (w(z_i) f(z_i) - w(z'_i) f(z'_i)) \right| + \sqrt{\frac{2 \ln \frac{1}{\delta}}{n}} \\ & \leq \mathbb{E}_{S \sim D^n, S' \sim D^n, \sigma \sim U(\{-1, +1\}^n)} \sup_{f \in \mathcal{F}} \left| \frac{1}{n} \sum_{i=1}^n \sigma_i (w(z_i) f(z_i) - w(z'_i) f(z'_i)) \right| + \sqrt{\frac{2 \ln \frac{1}{\delta}}{n}} \\ & \leq 2 \mathbb{E}_{S \sim D^n, \sigma \sim U(\{-1, +1\}^n)} \sup_{f \in \mathcal{F}} \left| \frac{1}{n} \sum_{i=1}^n \sigma_i w(z_i) f(z_i) \right| + \sqrt{\frac{2 \ln \frac{1}{\delta}}{n}} \\ & \leq 2 \sqrt{\frac{2 \ln (2 \mathcal{S}(\mathcal{F}, n))}{n}} + \sqrt{\frac{2 \ln \frac{1}{\delta}}{n}} \leq \sqrt{\frac{16(\ln \mathcal{S}(\mathcal{F}, n) + \ln \frac{2}{\delta})}{n}} \end{aligned}$$

Where the first inequality is by McDiarmid's Lemma; the second inequality follows from Jensen's Inequality; the third inequality follows from symmetry; the fourth inequality follows from  $|A+B| \leq |A| + |B|$ ; the fifth inequality follows from Massart's Finite Lemma.  $\square$

**Lemma 17.** *Let  $0 < 2\eta \leq r \leq 1$ . Given a hypothesis set  $V$  and data distribution  $D$  over  $\mathcal{X} \times \mathcal{Y}$ , if there exist  $h_1, h_2 \in V$  such that  $\rho_D(h_1, h_2) \geq r$ , then  $\Phi_D(V, \eta) \geq r - 2\eta$ .*

*Proof.* Let  $(\xi, \zeta, \gamma)$  be a triple of functions from  $\mathcal{X}$  to  $\mathbb{R}^3$  satisfying the following conditions:  $\xi, \zeta, \gamma \geq 0$ ,  $\xi + \zeta + \gamma \equiv 1$ , and for all  $h \in V$ ,

$$\mathbb{E}_D[\xi(x)I(h(x) = +1) + \zeta(x)I(h(x) = -1)] \leq \eta$$

Then, in particular, we have:

$$\mathbb{E}_D[\xi(x)I(h_1(x) = +1) + \zeta(x)I(h_1(x) = -1)] \leq \eta$$

$$\mathbb{E}_D[\xi(x)I(h_1(x) = +1) + \zeta(x)I(h_2(x) = -1)] \leq \eta$$

Thus, by  $I(h_1(x) \neq h_2(x)) \leq \min(I(h_1(x) = -1) + I(h_1(x) = -1), I(h_2(x) = +1) + I(h_2(x) = +1))$ , adding the two inequalities up,

$$\mathbb{E}_D[(\xi(x) + \zeta(x))I(h_1(x) \neq h_2(x))] \leq 2\eta$$

Since

$$\rho_D(h_1, h_2) = \mathbb{E}_D I(h_1(x) \neq h_2(x)) \geq r$$

We have

$$\mathbb{E}_D[\gamma(x)I(h_1(x) \neq h_2(x))] = \mathbb{E}_D[(1 - \xi(x) - \zeta(x))I(h_1(x) \neq h_2(x))] \geq r - 2\eta$$

Thus,

$$\mathbb{E}_D[\gamma(x)] \geq \mathbb{E}_D[\gamma(x)I(h_1(x) \neq h_2(x))] \geq r - 2\eta$$

Hence  $\Phi_D(V, \eta) \geq r - 2\eta$ .  $\square$

**Lemma 18.** *Given hypothesis set  $V$  and data distribution  $D$  over  $\mathcal{X} \times \mathcal{Y}$ ,  $0 < \lambda < \eta < 1$ , if there exist  $h_1, h_2 \in V$  such that  $\rho_D(h_1, h_2) \geq 2\eta - \lambda$ , then  $\Phi_D(V, \eta) + \lambda \leq \Phi_D(V, \eta - \lambda)$ .*

*Proof.* Suppose  $(\xi_1, \zeta_1, \gamma_1)$  are nonnegative functions satisfying  $\xi_1 + \zeta_1 + \gamma_1 \equiv 1$ , and for all  $h \in V$ ,  $\mathbb{E}_D[\zeta_1(x)I(h(x) = +1) + \xi_1(x)I(h(x) = -1)] \leq \eta - \lambda$ , and  $\mathbb{E}_D \gamma_1(x) = \Phi_D(V, \eta - \lambda)$ . Notice by Lemma 17,  $\Phi_D(V, \eta - \lambda) \geq 2\eta - \lambda - 2(\eta - \lambda) = \lambda$ .

Then we pick nonnegative functions  $(\xi_2, \zeta_2, \gamma_2)$  as follows. Let  $\xi_2 = \xi_1$ ,  $\gamma_2 = (1 - \frac{\lambda}{\Phi_D(V, \eta - \lambda)})\gamma_1$ , and  $\zeta_2 = 1 - \xi_2 - \gamma_2$ . It is immediate that  $(\xi_2, \zeta_2, \gamma_2)$  is a valid confidence rated predictor and  $\zeta_2 \geq \zeta_1$ ,  $\gamma_2 \leq \gamma_1$ ,  $\mathbb{E}_D \gamma_2(x) = \Phi_D(V, \eta - \lambda) - \lambda$ . It can be readily checked that the confidence rated predictor  $(\xi_2, \zeta_2, \gamma_2)$  has error guarantee  $\eta$ , specifically:

$$\begin{aligned} & \mathbb{E}_D[\zeta_2(x)I(h(x) = +1) + \xi_2(x)I(h(x) = -1)] \\ & \leq \mathbb{E}_D[(\zeta_2(x) - \zeta_1(x))I(h(x) = +1) + (\xi_2(x) - \xi_1(x))I(h(x) = -1)] + \eta - \lambda \\ & \leq \mathbb{E}_D[(\zeta_2(x) - \zeta_1(x)) + (\xi_2(x) - \xi_1(x))] + \eta - \lambda \\ & \leq \lambda + \eta - \lambda = \eta \end{aligned}$$

Thus,  $\Phi_D(V, \eta)$ , which is the minimum abstention probability of a confidence-rated predictor with error guarantee  $\eta$  with respect to hypothesis set  $V$  and data distribution  $D$ , is at most  $\Phi_D(V, \eta - \lambda) - \lambda$ .  $\square$

## H Detailed Derivation of Label Complexity Bounds

### H.1 Agnostic

**Proposition 1.** *In agnostic case, the label complexity of Algorithm 1 is at most*

$$\tilde{O}\left(\sup_{k \leq \lceil \log(1/\epsilon) \rceil} \frac{\phi(2\nu^*(D) + \epsilon_k, \epsilon_k/256)}{2\nu^*(D) + \epsilon_k} \left(d \frac{\nu^*(D)^2}{\epsilon^2} \ln \frac{1}{\epsilon} + d \ln^2 \frac{1}{\epsilon}\right)\right),$$

where the  $\tilde{O}$  notation hides factors logarithmic in  $1/\delta$ .

*Proof.* Applying Theorem 5, the total number of labels queried is at most:

$$c_4 \sum_{k=1}^{\lceil \log \frac{1}{\epsilon} \rceil} \left( d \ln \frac{\phi(2\nu^*(D) + \epsilon_k, \epsilon_k/256)}{\epsilon_k} + \ln \left( \frac{\lceil \log(1/\epsilon) \rceil - k + 1}{\delta} \right) \right) \frac{\phi(2\nu^*(D) + \epsilon_k, \epsilon_k/256)}{\epsilon_k} \left(1 + \frac{\nu^*(D)}{\epsilon_k}\right)$$



Using the fact that  $\phi(2\nu^*(D) + \epsilon_k, \epsilon_k/256) \leq 1$ , this is

$$\begin{aligned}
& c_4 \sum_{k=1}^{\lceil \log \frac{1}{\epsilon} \rceil} (d \ln \frac{\phi(2\nu^*(D) + \epsilon_k, \epsilon_k/256)}{\epsilon_k} + \ln(\frac{\lceil \log(1/\epsilon) \rceil - k + 1}{\delta})) \frac{\phi(2\nu^*(D) + \epsilon_k, \epsilon_k/256)}{\epsilon_k} (1 + \frac{\nu^*(D)}{\epsilon_k}) \\
&= \tilde{O} \left( \sum_{k=1}^{\lceil \log \frac{1}{\epsilon} \rceil} (d \ln \frac{\phi(2\nu^*(D) + \epsilon_k, \epsilon_k/256)}{\epsilon_k} + \ln \log(1/\epsilon)) \frac{\phi(2\nu^*(D) + \epsilon_k, \epsilon_k/256)}{2\nu^* + \epsilon_k} (1 + \frac{\nu^*(D)^2}{\epsilon_k^2}) \right) \\
&\leq \tilde{O} \left( \sup_{k \leq \lceil \log(1/\epsilon) \rceil} \frac{\phi(2\nu^*(D) + \epsilon_k, \epsilon_k/256)}{2\nu^*(D) + \epsilon_k} \sum_{k=1}^{\lceil \log \frac{1}{\epsilon} \rceil} (1 + \frac{\nu^*(D)^2}{\epsilon_k^2}) (d \ln \frac{1}{\epsilon} + \ln \ln \frac{1}{\epsilon}) \right) \\
&\leq \tilde{O} \left( \sup_{k \leq \lceil \log(1/\epsilon) \rceil} \frac{\phi(2\nu^*(D) + \epsilon_k, \epsilon_k/256)}{2\nu^*(D) + \epsilon_k} (d \frac{\nu^*(D)^2}{\epsilon^2} \ln \frac{1}{\epsilon} + d \ln^2 \frac{1}{\epsilon}) \right),
\end{aligned}$$

where the last line follows as  $\epsilon_k$  is geometrically decreasing.  $\square$

## H.2 Tsybakov Noise Condition with $\kappa > 1$

**Proposition 2.** Suppose the hypothesis class  $\mathcal{H}$  and the data distribution  $D$  satisfies  $(C_0, \kappa)$ -Tsybakov Noise Condition with  $\kappa > 1$ . Then the label complexity of Algorithm 1 is at most

$$\tilde{O} \left( \sup_{k \leq \lceil \log(1/\epsilon) \rceil} \frac{\phi(C_0 \epsilon_k^{\frac{1}{\kappa}}, \frac{\epsilon_k}{256})}{\epsilon_k^{\frac{1}{\kappa}}} \epsilon^{\frac{2}{\kappa}-2} d \ln \frac{1}{\epsilon} \right),$$

where the  $\tilde{O}$  notation hides factors logarithmic in  $1/\delta$ .

*Proof.* Applying Theorem 5, the total number of labels queried is at most:

$$c_5 \sum_{k=1}^{\lceil \log \frac{1}{\epsilon} \rceil} (d \ln(\phi(C_0 \epsilon_k^{\frac{1}{\kappa}}, \frac{\epsilon_k}{256}) \epsilon_k^{\frac{1}{\kappa}-2}) + \ln(\frac{k_0 - k + 1}{\delta})) \phi(C_0 \epsilon_k^{\frac{1}{\kappa}}, \frac{\epsilon_k}{256}) \epsilon_k^{\frac{1}{\kappa}-2}$$

Using the fact that  $\phi(C_0 \epsilon_k^{\frac{1}{\kappa}}, \frac{\epsilon_k}{256}) \leq 1$ , we get

$$\begin{aligned}
& c_5 \sum_{k=1}^{\lceil \log \frac{1}{\epsilon} \rceil} (d \ln(\phi(C_0 \epsilon_k^{\frac{1}{\kappa}}, \frac{\epsilon_k}{256}) \epsilon_k^{\frac{1}{\kappa}-2}) + \ln(\frac{k_0 - k + 1}{\delta})) \phi(C_0 \epsilon_k^{\frac{1}{\kappa}}, \frac{\epsilon_k}{256}) \epsilon_k^{\frac{1}{\kappa}-2} \\
&\leq \tilde{O} \left( \sup_{k \leq \lceil \log(1/\epsilon) \rceil} \frac{\phi(C_0 \epsilon_k^{\frac{1}{\kappa}}, \frac{\epsilon_k}{256})}{\epsilon_k^{\frac{1}{\kappa}}} \sum_{k=1}^{\lceil \log \frac{1}{\epsilon} \rceil} \epsilon_k^{\frac{2}{\kappa}-2} d \ln \frac{1}{\epsilon} \right) \\
&\leq \tilde{O} \left( \sup_{k \leq \lceil \log(1/\epsilon) \rceil} \frac{\phi(C_0 \epsilon_k^{\frac{1}{\kappa}}, \frac{\epsilon_k}{256})}{\epsilon_k^{\frac{1}{\kappa}}} \epsilon^{\frac{2}{\kappa}-2} d \ln \frac{1}{\epsilon} \right)
\end{aligned}$$

$\square$

## H.3 Fully Agnostic, Linear Classification of Log-Concave Distribution

We show in this subsection that in agnostic case, if  $\mathcal{H}$  is the class of homogeneous linear classifiers in  $\mathbb{R}^d$ ,  $D_{\mathcal{X}}$  is isotropic log-concave in  $\mathbb{R}^d$ , then, our label complexity bound is at most

$$O \left( \ln \frac{\epsilon + \nu^*(D)}{\epsilon} \left( \ln \frac{1}{\epsilon} + \frac{\nu^*(D)^2}{\epsilon^2} \right) (d \ln \frac{\epsilon + \nu^*(D)}{\epsilon} + \ln \frac{1}{\delta}) + \ln \frac{1}{\epsilon} \ln \frac{\epsilon + \nu^*(D)}{\epsilon} \ln \ln \frac{1}{\epsilon} \right)$$

Recall by Lemma 14, we have  $\phi(2\nu^*(D) + \epsilon_k, \epsilon_k/256) \leq C(\nu^*(D) + \epsilon_k) \ln \frac{\nu^*(D) + \epsilon_k}{\epsilon_k}$  for some constant  $C > 0$ . Applying Theorem 4, the label complexity is

$$O \left( \sum_{k=1}^{\lceil \log \frac{1}{\epsilon} \rceil} (d \ln(\frac{2\nu^*(D) + \epsilon_k}{\epsilon_k} \ln \frac{2\nu^*(D) + \epsilon_k}{\epsilon_k}) + \ln(\frac{\log(1/\epsilon) - k + 1}{\delta})) \ln \frac{2\nu^*(D) + \epsilon_k}{\epsilon_k} (1 + \frac{\nu^*(D)^2}{\epsilon_k^2}) \right)$$

This can be simplified to (treating 1 and  $\frac{\nu^*(D)^2}{\epsilon_k^2}$  separately)

$$\begin{aligned}
& O\left(\sum_{k=1}^{\lceil \log \frac{1}{\epsilon} \rceil} \ln \frac{\nu^*(D) + \epsilon_k}{\epsilon_k} \left(d \ln \frac{\nu^*(D) + \epsilon_k}{\epsilon_k} + \ln \frac{k_0 - k + 1}{\delta}\right)\right. \\
& \quad \left.+ \sum_{k=1}^{\lceil \log \frac{1}{\epsilon} \rceil} \frac{\nu^*(D)^2}{\epsilon_k^2} \ln \frac{\nu^*(D) + \epsilon_k}{\epsilon_k} \left(d \ln \frac{\nu^*(D) + \epsilon_k}{\epsilon_k} + \ln \frac{k_0 - k + 1}{\delta}\right)\right) \\
& \leq O\left(\ln \frac{1}{\epsilon} \ln \frac{\epsilon + \nu^*(D)}{\epsilon} \left(d \ln \frac{\epsilon + \nu^*(D)}{\epsilon} + \ln \ln \frac{1}{\epsilon} + \ln \frac{1}{\delta}\right) + \frac{\nu^*(D)^2}{\epsilon^2} \ln \frac{\epsilon + \nu^*(D)}{\epsilon} \left(d \ln \frac{\epsilon + \nu^*(D)}{\epsilon} + \ln \frac{1}{\delta}\right)\right) \\
& \leq O\left(\ln \frac{\epsilon + \nu^*(D)}{\epsilon} \left(\ln \frac{1}{\epsilon} + \frac{\nu^*(D)^2}{\epsilon^2}\right) \left(d \ln \frac{\epsilon + \nu^*(D)}{\epsilon} + \ln \frac{1}{\delta}\right) + \ln \frac{1}{\epsilon} \ln \frac{\epsilon + \nu^*(D)}{\epsilon} \ln \ln \frac{1}{\epsilon}\right)
\end{aligned}$$

#### H.4 Tsybakov Noise Condition with $\kappa > 1$ , Log-Concave Distribution

We show in this subsection that under  $(C_0, \kappa)$ -Tsybakov Noise Condition, if  $\mathcal{H}$  is the class of homogeneous linear classifiers in  $\mathbb{R}^d$ , and  $D_{\mathcal{X}}$  is isotropic log-concave in  $\mathbb{R}^d$ , our label complexity bound is at most

$$O(\epsilon^{\frac{2}{\kappa}-2} \ln \frac{1}{\epsilon} (d \ln \frac{1}{\epsilon} + \ln \frac{1}{\delta}))$$

Recall by Lemma 14, we have  $\phi(C_0 \epsilon_k^{\frac{1}{\kappa}}, \frac{\epsilon_k}{256}) \leq C \epsilon_k^{\frac{1}{\kappa}} \ln \frac{1}{\epsilon_k}$  for some constant  $C > 0$ . Applying Theorem 5, the label complexity is:

$$O\left(\sum_{k=1}^{\lceil \log \frac{1}{\epsilon} \rceil} \left(d \ln(\phi(C_0 \epsilon_k^{\frac{1}{\kappa}}, \frac{\epsilon_k}{256}) \epsilon_k^{\frac{1}{\kappa}-2}) + \ln(\frac{k_0 - k + 1}{\delta})\right) \phi(C_0 \epsilon_k^{\frac{1}{\kappa}}, \frac{\epsilon_k}{256}) \epsilon_k^{\frac{1}{\kappa}-2}\right)$$

This can be simplified to :

$$\begin{aligned}
& O\left(\sum_{k=1}^{\lceil \log \frac{1}{\epsilon} \rceil} \left(d \ln(\epsilon_k^{\frac{2}{\kappa}-2} \ln \frac{1}{\epsilon_k}) + \ln(\frac{k_0 - k + 1}{\delta})\right) \epsilon_k^{\frac{2}{\kappa}-2} \ln \frac{1}{\epsilon_k}\right) \\
& \leq O\left(\left(\sum_{k=1}^{\lceil \log \frac{1}{\epsilon} \rceil} \epsilon_k^{\frac{2}{\kappa}-2}\right) \ln \frac{1}{\epsilon} \left(d \ln \frac{1}{\epsilon} + \ln \frac{1}{\delta}\right)\right) \\
& \leq O(\epsilon^{\frac{2}{\kappa}-2} \ln \frac{1}{\epsilon} (d \ln \frac{1}{\epsilon} + \ln \frac{1}{\delta}))
\end{aligned}$$
